1 **SAFA facilitates chromatin opening of immune genes through interacting with**  
2 **nascent antiviral RNAs**

3 Lili Cao <sup>1,2,7</sup>, Yunfei Li <sup>1,7</sup>, Yujie Luo <sup>1,7</sup>, Xuefei Guo <sup>1</sup>, Shengde Liu <sup>1</sup>, Siji Li <sup>1</sup>, Junhong Li <sup>3</sup>,  
4 Zeming Zhang <sup>1</sup>, Yingchi Zhao <sup>1</sup>, Qiao Zhang <sup>4</sup>, Feng Gao <sup>4</sup>, Xiong Ji <sup>5</sup>, Yiguang Wang <sup>2</sup>,  
5 Xiang Gao <sup>6</sup>, Fuping You <sup>1,8</sup>

6 <sup>1</sup> Institute of Systems Biomedicine, Department of Immunology, School of Basic Medical  
7 Sciences, Beijing Key Laboratory of Tumor Systems Biology, Peking University Health  
8 Science Center, Beijing, 100191, China.

9 <sup>2</sup> Department of Pharmaceutics, School of Pharmaceutical Sciences, Peking University,  
10 Beijing 100191, China

11 <sup>3</sup> University of Chinese Academy of Sciences, CAS Key Laboratory of Infection and  
12 Immunity, National Laboratory of Macromolecules, Institute of Biophysics, Chinese  
13 Academy of Sciences, Beijing, 100101, China.

14 <sup>4</sup> School of Medicine, Jinan University, Guangzhou, Guangdong, 510632, China.

15 <sup>5</sup>Key Laboratory of Cell Proliferation and Differentiation of the Ministry of Education, School  
16 of Life Sciences, Peking-Tsinghua Center for Life Sciences, Peking University, Beijing,  
17 100871, China.

18 <sup>6</sup> State Key Laboratory of Microbial Technology, Microbial Technology Institute, School of  
19 life science, Shandong University, Qingdao, 266000, China.

20 <sup>7</sup> These authors contributed equally.

21 <sup>8</sup> Lead Contact.

22 Corresponding author: Fuping You Ph.D, Institute of Systems Biomedicine, Department  
23 of Immunology, Beijing Key Laboratory of Tumor Systems Biology, Peking University  
24 Health Science Center, 100191, Beijing, China. [fupingyou@hsc.pku.edu.cn](mailto:fupingyou@hsc.pku.edu.cn).

25

## 26 **Summary**

27 Regulation of chromatin accessibility determines the transcription activities of genes,  
28 which endow the host with function-specific gene expression patterns. It remains unclear  
29 how chromatin accessibility is specifically directed, particularly, during host defense against  
30 viral infection. We previously reported that the nuclear matrix protein SAFA surveils viral  
31 RNA and regulates antiviral immune genes expression. However, how SAFA regulates the  
32 expression and what determines the specificity of antiviral immune genes remains  
33 unknown. Here, we identified that the depletion of SAFA specifically decreased the  
34 chromatin accessibility, activation and expression of virus induced genes in a genome-wide  
35 scale after VSV infection. SAFA exclusively bound with antiviral related RNAs, which  
36 mediated the specific opening of the according chromatin and robust transcription of these  
37 genes. Knockdown of these associated RNAs dampened the accessibility of corresponding  
38 genes in an extranuclear signaling pathway dependent manner. Moreover, VSV infection  
39 cleaved SAFA protein at the C-terminus which deprived its RNA binding ability for immune  
40 evasion. Thus, our results demonstrated that SAFA and the interacting RNA products  
41 during viral infection collaborate and remodel chromatin accessibility to facilitate antiviral  
42 innate immune response.

43

## 44 **Introduction**

45 In the eukaryotic cell nucleus, the chromatin structures are hierarchical ordered, ranging  
46 from kilobase to megabase scales (Belmont, 2014; Bonev and Cavalli, 2016). The multiple  
47 levels including nucleosome, loops, topologically associated domains (TADs), A/B  
48 compartments and territories (Cremer and Cremer, 2010; Lieberman-Aiden et al., 2009;  
49 Pope et al., 2014). Chromatin is the template of all DNA-related processes. The proper  
50 regulation of chromatin structure and the subsequent accessibility of DNA are essential for  
51 the performance of numerous cellular functions (Agarwal and Rao, 1998; Hao et al., 2019;  
52 Kim and Kaang, 2017; Masliah-Planchon et al., 2015; Nguyen et al., 2001). Upon viral  
53 infection, the innate immune response provides a first line of defense, allowing rapid  
54 production of variegated anti-viral cytokines (Akira and Takeda, 2004; Beutler, 2004;  
55 Takeuchi and Akira, 2010). This process is primarily controlled by dynamic organization of

56 the genome, which reprogrammed the specific genomic regions from a condensed state  
57 to a transcriptionally accessible state (Klemm et al., 2019; Lanctot et al., 2007). Hence,  
58 there should be a precise molecular mechanism underpinning the reprogramming of  
59 defensive responses.

60 Processes involved in the alteration of chromatin accessibility are diverse, including  
61 post-translational modifications of histones, incorporation of histone variants, DNA  
62 methylation and ATP-dependent chromatin remodeling (Bao et al., 2019; Deuring et al.,  
63 2000; Govin et al., 2004; Venkatesh and Workman, 2015). There is accumulating evidence  
64 indicating that RNAs also play an important role (Caudron-Herger and Rippe, 2012; Dong  
65 et al., 2020; Gupta et al., 2010; Han and Chang, 2015; Mousavi et al., 2013). The RNA  
66 encoded by HOXC locus represses transcription of the HOXD locus through interacting  
67 with the polycomb repressive complex 2 (PRC2) (Rinn et al., 2007). During the process of  
68 mammal X-chromosome inactivation, the stable repression of all X-linked genes is  
69 mediated by the long noncoding RNA, Xist, which is transcribed from specific X-linked  
70 sequences (Gendrel and Heard, 2014). Xist induces a cascade of chromatin changes,  
71 including post-translational histone modifications and DNA methylation, by interacting with  
72 multiple proteins. These findings implicate the regulation roles of RNAs in gene expression  
73 are not only broad spectrum but also related to corresponding locus. 62%–75% of the  
74 human genome is capable of producing various RNA species, but less than 2% encodes  
75 proteins (Djebali et al., 2012). RNAs reflect the direct production of the genetic information  
76 encoded by genomes. In addition, RNAs production is highly dynamic that different species  
77 and amounts of RNAs are produced at different stages of transcription (Morris and Mattick,  
78 2014; Roden and Gladfelter, 2021). These led us to wonder whether determination and  
79 characterization of the regulatory regions of chromatin are regulated by the RNA product  
80 during viral infection.

81 Scaffold attachment factor A (SAF-A), also known as heterogeneous ribonucleoprotein  
82 U (HNRNP-U), is an abundant nuclear matrix associated protein (Fackelmayer et al., 1994).  
83 Traditionally, SAFA is an RNA-binding protein mainly involved in regulating gene  
84 transcription and RNA splicing (Geuens et al., 2016). Several reports suggest that SAFA  
85 plays a critical role in the recruitment of Xist RNA in inactive X chromosome (Kolpa et al.,

86 2016). Recently, SAFA was demonstrated to play a central role in regulating chromatin  
87 architecture. The *in situ* Hi-C assay showed that SAFA mainly binds to active chromatin  
88 (Fan et al., 2018). Disruption of SAFA leads to compartment switching from B to A and  
89 reduces the TAD boundary strengths at borders between two types of compartments (Fan  
90 et al., 2018). Nozawa et al. reported that oligomerized SAFA remodels interphase  
91 chromatin structures through interaction with nascent RNAs (Nozawa et al., 2017). SAFA  
92 oligomerization decompacts large-scale chromatin structure while SAFA deficiency or  
93 monomerization promotes aberrant chromosome folding (Nozawa et al., 2017). Our  
94 previous study suggests that SAFA surveils viral RNA in the nucleus and facilitates innate  
95 immune response by activating antiviral enhancers and super-enhancers (Cao et al.,  
96 2019a). Interestingly, this process was also dependent on SAFA oligomerization. Viral  
97 infection induces SAFA oligomerization, which is essential for the activation of antiviral  
98 immune responses (Cao et al., 2019a). However, it is unknown if or how SAFA regulates  
99 the accessibility of the specific chromatin locus coding antiviral genes during virus infection.

100 In the present study, by combining Assay for Transposase-Accessible Chromatin with  
101 high throughput sequencing (ATAC-seq), Chromatin immunoprecipitation followed by  
102 sequencing (ChIP-seq) and bulk RNA- sequencing (RNA-seq), we assessed the genome-  
103 wide chromatin accessibility and gene expression in wild type and SAFA deficient cells  
104 after viral infection, and found that SAFA was essential for the chromatin accessibility and  
105 activation of antiviral immune genes. In addition, this process is dependent on the  
106 association of SAFA with nascent transcripts. Mechanistically, RNAs produced during viral  
107 infection interacted with SAFA and mediated the accessibility of related chromatin regions  
108 in an extranuclear antiviral signaling pathways dependent manner, which mediated the  
109 expression of antiviral genes. Intriguingly, on the other hand, viral infection induced  
110 cleavage of SAFA that separated its RNA binding domain for immune evasion. Hence, the  
111 canonical antiviral pathways directed production of nascent antiviral transcripts, which  
112 bound to and activated SAFA, and in turn SAFA further facilitated transcription of these  
113 antiviral genes by increasing the openness of chromatin.

114

115 **Results**

116 **SAFA deficiency decreased the chromatin accessibility of antiviral immune genes**

117 To explore the potential role of SAFA in regulating chromatin accessibility during viral  
118 infection, we performed ATAC-seq and RNA-seq analysis in wild type and SAFA deficient  
119 (*SAFA*<sup>-/-</sup>) THP-1 cells (Figure S1A). SAFA deficiency led to an extensive decrease in  
120 chromatin accessibility at both the promoter and the UTR regions during VSV infection  
121 (Figure 1A and S1B). Intriguingly, the decrease of chromatin accessibility by SAFA  
122 disruption exclusively took place at the locus governing the expression of viral induced  
123 genes, but not housekeeping locus (Figure 1B and S1C). The openness of the locus  
124 induced over 1000 fold in THP-1 cells after VSV infection was apparently impaired due to  
125 SAFA depletion, while the locus where the accessibility had no obvious impact during viral  
126 infection also showed no significant differences in infected *SAFA*<sup>-/-</sup> cells (Figure 1B and  
127 S1C). The Gene Ontology (GO) term enrichment analysis showed that these genes  
128 significantly affected by SAFA depletion were involved in type I interferon signaling pathway  
129 and host defense response to virus (Figure 1C). Type I IFNs and ISGs are potent innate  
130 antiviral immune response effectors. Consistently, the chromatin accessibility of related  
131 ISGs were greatly decreased in SAFA deficient cells (Figure 1D, 1E and S1D). *CXCL10*,  
132 *CCL5*, *DDX58*, *ISG15*, *MX1* and *OASL* are known to code important antiviral effectors.  
133 *CXCL10*, *ISG15*, *MX1* and *OASL* are important interferon-stimulated genes (ISGs)  
134 (Schneider et al., 2014; Schoggins and Rice, 2011). *CCL5* is a T cell chemoattractant that  
135 is critical for immune control of viral infections (Crawford et al., 2011). Retinoic acid-  
136 inducible gene 1 (RIG-I), which is encoded by *DDX58* gene, is critical for sensing of  
137 cytoplasmic viral RNA to initiate and modulate antiviral innate immunity (Loo and Gale,  
138 2011). The virus induced chromatin accessibility of these genes was robustly decreased in  
139 *SAFA*<sup>-/-</sup> cells (Figure 1E). The transcription factor enrichment analysis revealed a loss of  
140 accessibility for genes with IRF3, IRF1, IRF8 and IRF2 motifs (Figure 1F). Notably,  
141 interferon regulatory factors (IRF) target genes have a critical role in the regulation of host  
142 defense (Taniguchi et al., 2001).

143 Integrated analysis of RNA-seq and ATAC-seq revealed that genes with reduced  
144 chromatin accessibility also showed significant lower expression levels (Figure 1G).  
145 Correspondingly, the downregulated genes in SAFA deficient cells after VSV infection were

146 mainly enriched in innate immune response to virus (Figure S1E). Together, these results  
147 suggest that SAFA mediates the chromatin accessibility of antiviral immune genes after  
148 viral infection.

149

### 150 **SAFA deficiency decreased the activation of antiviral immune genes**

151 Enhancers and promoters are key regulatory DNA elements that control gene expression  
152 (Juven-Gershon and Kadonaga, 2010; Ong and Corces, 2011). The accessible chromatin  
153 reflects a permission for physical interactions of transcription machineries with enhancers  
154 and promoters, which regulate transcriptional activation (Klemm et al., 2019). To confirm  
155 the role of SAFA in enhancing the chromatin accessibility of antiviral genes, we performed  
156 ChIP-seq analysis with H3 lysine 27 acetylation (H3K27ac) antibody. Enhancer activation  
157 was marked by high level of H3K27ac (Creyghton et al., 2010). Our previous results  
158 showed that SAFA facilitates distal enhancer activation of type I IFN (Cao et al., 2019a).  
159 Here we assessed the impact of SAFA on activation of virus-induced enhancers in a  
160 genome-wide scale (Figure 2A and S2A). SAFA deficiency downregulated the enhancer  
161 activation globally after VSV infection (Figure 2A). There were 24799 enhancers in resting  
162 wild type THP-1 cells, 27828 after VSV infection for 8 hours, and 28964 after VSV infection  
163 for 24 hours. As for *SAFA*<sup>-/-</sup> cells, there were 24499 enhancers in resting cells, 26225 after  
164 VSV infection for 8 hours, and 28150 after VSV infection for 24 hours (Figure S2B). The  
165 consequences can be even greater at the early stage of infection (Figure S2C). Moreover,  
166 these enhancers inactivated by SAFA disruption were mainly involved in response to virus  
167 infection (Figure 2B).

168 Super-enhancers are clusters of enhancers across a long range of genomic DNA, which  
169 drive expression of genes that define cell state (Hnisz et al., 2013; Pott and Lieb, 2015). It  
170 was also marked by H3K27ac. Further analysis showed that SAFA is required for the  
171 activation of super-enhancers induced by viral infection. There were 615 super-enhancers  
172 in resting THP-1 cells, 832 after VSV infection for 8 hours, and 908 after VSV infection for  
173 24 hours. In *SAFA*<sup>-/-</sup> cells, there were 602 super-enhancers in untreated cells, 726 after  
174 VSV infection for 8 hours, and 878 after VSV infection for 24 hours (Figure 2C). SAFA  
175 deficiency decreased the formation of super-enhancers after VSV infection, especially at

176 the early stage of infection (Figure 2D and S2D). Meanwhile, SAFA depletion showed no  
177 obvious impact on the formation of super-enhancers that insensitive to VSV infection  
178 (Figure 2D), suggesting that SAFA mainly affected the induction of super-enhancers  
179 related to viral infection. The enrichment analysis suggested that these super-enhancers  
180 associated genes significantly downregulated by SAFA depletion were involved in immune  
181 responses and host defense to virus (Figure 2E). Consistently, the super-enhancer  
182 formation of *CXCL9/10/11*, *OAS1*, *IFITM1/2/3*, *IRAK2*, *IFI16* and *IFI44* genes was robustly  
183 decreased in SAFA mutant cells after virus infection (Figure 2F). *CXCL9/10/11*, *OAS1*,  
184 *IFITM1/2/3*, *IFI16* and *IFI44* are important ISGs (Schneider et al., 2014; Schoggins and  
185 Rice, 2011). *IRAK2* is an essential adaptor of the Toll-like receptors (TLR) signaling  
186 pathway, which is important for downstream defense molecules production (Meylan and  
187 Tschopp, 2008). Moreover, the majority of these impaired super-enhancer-driven genes  
188 were protein-coding genes, but there was also a considerable part of non-coding genes  
189 (Figure S2E). Therefore, SAFA is required for virus induced enhancers/super-enhancers  
190 activation.

191

### 192 **RNA binding activity of SAFA is critical for increasing the accessibility of anti-viral** 193 **chromatin**

194 We then investigated the mechanism by which SAFA specifically increased chromatin  
195 accessibility of antiviral genes after infection. In the interphase, SAFA remodels the  
196 chromatin structures through the interaction with nascent RNAs (Nozawa et al., 2017).  
197 There is an increasing body of evidence suggesting that RNAs are involved in regulation  
198 of chromatin accessibility. By using genome-wide binding profiling, Kambiz et al. showed  
199 that eRNAs regulate genomic accessibility of the transcriptional complex to defined  
200 regulatory regions (Mousavi et al., 2013). Dong et al. reported that the lncRNA, *LncMyoD*,  
201 regulates lineage determination and progression through modulating chromatin  
202 accessibility (Dong et al., 2020). Our previous results suggest that SAFA facilitates anti-  
203 viral innate immune responses, which is also dependent on the RNA-binding ability (Cao  
204 et al., 2019a). These prompted us to investigate whether the regulation of chromatin  
205 accessibility by SAFA during virus infection is also dependent on the interaction with RNAs.

206 Structurally, SAFA contains an N-terminal DNA-binding domain, an ATP-binding AAA+  
207 domain, a SPRY domain and an RNA-binding RGG repeat at the C-terminal (Erzberger  
208 and Berger, 2006; Romig et al., 1992). We rescued the full-length (Flag-SAFA) and RGG  
209 domain depleted (Flag-Del-RGG) Flag tagged SAFA plasmids into *SAFA*<sup>-/-</sup> THP-1 cells,  
210 which enabled their stable expression (Figure S3A). Further, we did ATAC-seq and RNA-  
211 seq in both cell lines (Figure 3A). The results showed that after VSV infection, the genome-  
212 wide chromatin accessibility was downregulated in RGG domain mutated cells compared  
213 with that in Flag-SAFA cells (Figure 3B and S3B). The GO enrichment analysis showed  
214 that these downregulated genes were mainly involved in immune response and response  
215 to interferon (Figure 3C). Consistently, the chromatin accessibility of ISGs were  
216 significantly decreased in RGG domain depleted cells (Figure 3D, 3E and S3C), and the  
217 genome-wide transcription factor enrichment analysis inferred an impaired association of  
218 genes with IRF motifs in them (Figure 3F).

219 Moreover, the expression of anti-viral genes was obviously downregulated in Flag-Del-  
220 RGG cells (Figure 3G). RGG domain depletion mainly affected the regulation of type I  
221 interferon-mediated signaling pathway following viral infection (Figure S3D). These results  
222 suggest that the RNA-binding ability is essential for SAFA in maintaining chromatin  
223 accessibility of antiviral immune genes during viral infection.

224

## 225 **SAFA interacted with antiviral related RNAs in a time-dependent manner during viral** 226 **infection**

227 To gain further insight into the role of RNA-binding ability of SAFA in chromatin structure  
228 regulation after viral infection, we performed RNA immunoprecipitation sequencing (RIP-  
229 seq) of THP-1 cells following VSV infection for 6 hours and 24 hours (Figure S4) (Zhao et  
230 al., 2010). SAFA showed differential binding profiles at different stages of viral infection  
231 (Figure 4A). The RNAs interacting with SAFA were increased by 42.54% and 51.01% after  
232 VSV infection for 6 hours and 24 hours respectively (Figure 4B). More than 50% of the total  
233 increased SAFA binding RNAs were protein coding mRNAs after VSV infection (Figure 4B).  
234 There is also a considerable part of noncoding RNAs (ncRNAs), especially lncRNA (Figure  
235 4B).



236 GO enrichment analysis revealed that these RNAs differentially interacting with SAFA  
237 were mainly involved in response to virus and protein binding after viral infection for 6 hours  
238 (Figure 4C). At the later stage of infection, these associated RNAs were almost entirely  
239 related to defense response to virus (Figure 4C). Among those RNAs, *CCL5*, *IFIT1/2/3*,  
240 *CXCL10*, *MAVS*, *DDX58*, *ISG15*, *OASL* and *IFI44* are known to encode important innate  
241 antiviral effectors (Figure 4D) (Crawford et al., 2011; Loo and Gale, 2011; Schneider et al.,  
242 2014; Schoggins and Rice, 2011). Furthermore, the results of more detailed time points  
243 suggested that the interaction of SAFA with these RNAs showed a time-dependent manner,  
244 in which the binding first increased with the time after VSV infection, peaked at about 24  
245 hours and then dropped around 48 hours (Figure 4E). Thus, these results showed that  
246 SAFA interacted with antiviral related RNAs in a time dependent manner after viral infection.  
247

#### 248 **SAFA-interacting RNA mediated specific chromatin remodeling in an extranuclear** 249 **pathway dependent manner**

250 There is accumulating evidence suggests that RNA molecules are components of and  
251 play regulatory roles at different stages of transcription. Recent studies have shown that  
252 RNAs produced during early steps in transcription initiated the transcriptional condensate  
253 formation (Henninger et al., 2021). Moreover, the regulation roles of RNAs in gene  
254 expression showed locus-specific characteristics, which tends to regulate the expression  
255 of adjacent or related genes (Dong et al., 2020; Gendrel and Heard, 2014; Mousavi et al.,  
256 2013; Rinn et al., 2007). The RNA binding-dependent regulatory activity of SAFA, coupled  
257 with evidence that the associated RNAs are mainly antiviral innate immunity related, led  
258 us to wonder whether the SAFA-interacting RNA mapped or characterized the regulatory  
259 regions of accessible chromatin during viral infection.

260 To explore the potential role of SAFA-interacting RNA in regulating chromatin  
261 accessibility, we sought to knockdown the specific RNA product by CRISPR-Cas13d  
262 system and further detect the chromatin accessibility with ATAC-qPCR after viral infection  
263 (Figure 5A) (Kushawah et al., 2020). Results showed that this system could induce efficient  
264 RNA knockdown after VSV infection, and we selected CRISPR RNA (crRNA) 3# for *IFIT1*,  
265 crRNA 1# for *ISG15*, crRNA 2# for *CXCL10*, crRNA 3# for *CCL5*, crRNA 1# for *IFNB1* and

266 crRNA 2# for *DDX58* for further experiments (Figure 5B). Interestingly, cells expressing  
267 specific crRNA were not able to sustain corresponding chromatin accessible during viral  
268 infection (Figure 5C). Consistently, the corresponding mRNA expression were apparently  
269 knockdown (Figure S5A). These results suggest that RNA product interacting with SAFA  
270 after viral infection mediated the accessibility of corresponding chromatin regions.

271 Notably, almost all of these VSV induced RNAs are known to require the RLR pathways  
272 for induction, and MAVS, a key adaptor protein of RLR signaling, mediates the recruitment  
273 of downstream transcription factors NF $\kappa$ B and IRFs and the transcriptional activation of  
274 interferons and proinflammatory cytokine genes. We thus infected wild-type and *MAVS*<sup>-/-</sup>,  
275 *IRF3*<sup>-/-</sup> THP-1 cells with VSV and did ATAC-qPCR. Compared with those in wild-type cells,  
276 the inducible accessibilities of *IFIT1*, *CXCL10*, *CCL5*, *IFNB1*, *DDX58* and *ISG15* were  
277 largely decreased in *MAVS*<sup>-/-</sup> and *IRF3*<sup>-/-</sup> cells (Figure S5B). The strong dependence of  
278 chromatin accessibility on MAVS and IRF3 supports that extranuclear signaling pathways  
279 confer a requirement for remodeling of chromatin after viral infection.

280

### 281 **Virus-mediated cleavage separates the RNA-binding domain from SAFA**

282 Interestingly, in VSV infected THP-1 cells, we repeatedly observed a protein band just  
283 under the SAFA protein, with a smaller molecular weight of 10–20 kDa, and this phenotype  
284 appeared as early as 1 hour after VSV treatment (Figure 6A). Similar results were observed  
285 in primary murine bone marrow derived macrophages (BMDM) and HEK293T cells (Figure  
286 6A and S6A). Thus, we reasoned that VSV infection might promote cleavage of SAFA  
287 protein.

288 To prove this hypothesis, we infected HEK293T cells that overexpressed N-terminal  
289 3XHA-tagged SAFA with VSV, and a clear band similar to endogenous result was  
290 observed (Figure 6B). This result indicated that VSV infection led to a cut of SAFA at the  
291 C terminus, thus releasing the big N-terminal fragment. Further, we immunoprecipitated  
292 the cleaved band with SAFA antibody and visualized it with coomassie brilliant blue R250  
293 staining. Then this band was cut out and sent for mass spectrometry analysis. The detected  
294 amino acid sequences located in the N-terminal SAP domain and the middle SPRY and  
295 AAA+ domain, but not the C-terminal RGG domain (Figure 6C), and the last amino acid

296 detected was Lys<sup>675</sup>. However, when we infected cells that overexpressed Lys<sup>675</sup> mutant  
297 with VSV, the cleaved bands still appeared (Data not shown). Further, we constructed two  
298 3XHA-tagged deletion mutants that deleted the 650 to 675 amino acids (3XHA-Del650-  
299 675) or the 675-700 amino acids (3XHA-Del675-700). It was found that 3XHA-Del650-675  
300 mutant showed resistance to VSV-infection induced cleavage of SAFA, indicating that  
301 amino acids 650 to 675 were VSV targeted sequences (Figure 6D). These results suggest  
302 that VSV infection mediated cleavage of SAFA which separates the RNA-binding domain  
303 (Figure 6E).

304 In agreement, HEK293T cells expressing the mutated SAFA (Flag-Del-650-675)  
305 produced more type I-IFNs compared with wild-type SAFA upon VSV infection (Figure 6F  
306 and S6B-C). Besides, RGG domain deletion (Flag-Del-RGG) deprived SAFA of facilitating  
307 interferon production and neither the fragment 1-675 nor the fragment 675-825 could  
308 augment IFN- $\beta$  activation (Figure 6F and S6C), indicating that the antiviral function of  
309 SAFA is depend on the integrity of the big N-terminal fragment and the C-terminal RGG  
310 domain. Further, we expressed these mutants into THP-1 cells (Figure S6D). Compared  
311 with that in the Flag-SAFA expressing cells, the synergistic effect of SAFA-induced  
312 interferon and ISGs production after VSV infection was increased in the Flag-Del-650-675  
313 expressing cells and decreased in the Flag-Del-RGG expressing cells (Figure 6G and 6H).  
314 Consistently, the mutated SAFA (Flag-Del-650-675) suppressed the replication of VSV  
315 more effectively (Figure 6I). These data collectively demonstrated the importance of RNA  
316 binding ability of SAFA in antiviral immune response.

317

## 318 **Discussion**

319 Chromatin accessibility plays a central role in regulation of gene expression. The innate  
320 immune system responses rapidly to invading pathogens, which immediately produces  
321 various cytokines to eliminate the infection. The presence of accurate and effective  
322 cytokines production that can resolve the infection without causing host pathology is pivotal  
323 for the host. We previously reported that the nuclear matrix protein SAFA surveils viral RNA  
324 and regulates antiviral gene expression (Cao et al., 2019a). However, how SAFA activates  
325 and regulates the expression and what determines the specificity of antiviral immune genes

326 remains unknown. In the present study, we identified that SAFA regulated chromatin  
327 accessibility of antiviral gene and the SAFA-interacting RNA mapped the specific genomic  
328 sites. First, accumulating evidence has shown that SAFA is involved in regulation of  
329 chromatin structure from a compacted state to an active open state, indicating that SAFA  
330 showed important potential in chromatin remodeling (Fan et al., 2018; Nozawa et al., 2017).  
331 Second, our genome wide sequencing results by ATAC-seq, RNA-seq and ChIP-seq in  
332 wild-type and SAFA deficient cells after VSV infection showed that SAFA is essential for  
333 chromatin accessibility, gene expression and enhancers/super-enhancers activation of  
334 antiviral genes (Figure 1 and 2). Third, in the interphase, SAFA remodels chromatin  
335 structure through oligomerization with chromatin-associated RNAs (Nozawa et al., 2017).  
336 Our results suggest that the RNA binding ability of SAFA is also indispensable for its  
337 function in that the RGG domain depletion deprived its role in regulating chromatin  
338 accessibility after viral infection (Figure 3). Intriguingly, VSV infection induced cleavage of  
339 SAFA that removed the RGG domain (Figure 6), indicating the importance of RNA-binding  
340 ability of SAFA in antiviral response.

341 Modulation of chromatin accessibility determines which gene is to be transcribed and  
342 therefore, chromatin modulation determination during viral infection is critical (Klemm et al.,  
343 2019; Tsompana and Buck, 2014). Our results suggested that SAFA mediates the  
344 modulation of anti-viral chromatin accessibility and this process is dependent on its RNA-  
345 binding ability (Figure 3). Further RIP-seq results showed that the RNAs interacting with  
346 SAFA after viral infection are mainly antiviral related (Figure 4), and knockdown of these  
347 RNAs impaired the accessibility of specific genomic sites (Figure 5). These results indicate  
348 that the RNA product during viral infection mediated the accessibility of related genes.  
349 Rigorous regulation of cytokines production is a crucial cellular process, in which different  
350 kinds and levels of cytokines are produced at different stages of infection. RNA products  
351 are diverse and short-lived and reflect the transcriptional program directly, showing great  
352 potential in regulation of biological processes (Morris and Mattick, 2014; Roden and  
353 Gladfelter, 2021). There are growing evidence suggesting that RNAs play important roles  
354 in regulation of chromatin accessibility at defined genomic loci (Caudron-Herger and Rippe,  
355 2012; Dong et al., 2020; Huo et al., 2020; Mousavi et al., 2013). Moreover, it has been

356 reported that RNA product provides feedback on transcription via regulation of electrostatic  
357 interactions in transcriptional condensates (Henninger et al., 2021). SAFA protein showed  
358 multivalent interactions potential that it undergoes oligomerization after binding to RNAs  
359 during viral infection, indicating that condensates formation may occur during the activation  
360 of SAFA (Lin and Cao, 2020).

361 To escape the inhibitory effects of host immune system, viruses have evolved various  
362 mechanisms to dampen the immune response. During DNA virus infection, inflammatory  
363 caspases cleave cGAS at the N- terminal that renders its activity in facilitating type I  
364 interferons production (Wang et al., 2017). Cleavage of hnRNP-M is a general strategy  
365 utilized by picornaviruses to facilitate viral replication (Jagdeo et al., 2015). Here we report  
366 that VSV cleaved both human and mice SAFA protein, resulting in RGG domain depletion  
367 from SAFA (Figure 6).

368 Extranuclear signaling pathways were generally critical for anti-viral signal transduction.  
369 These signals eventually converge in the nucleus. SAFA, which predominantly localized in  
370 the nucleus, oligomerized with the generated RNA product and initiated and maintained  
371 the openness of corresponding genes. ATAC-qPCR results showed that the accessibility  
372 of antiviral immune genes was determined by the RNA product interacted with SAFA in an  
373 extranuclear signaling pathway dependent way (Figure S5B). Thus, intranuclear and  
374 extranuclear signaling pathways cooperate and form a transcriptionally responsive mesh  
375 that remodels chromosome structures and facilitates anti-viral innate immunity.

376 Taken together, our results provide insights into how SAFA and RNAs collaborate to  
377 reprogram chromatin modulation specificity and accessibility to regulate antiviral gene  
378 expression.

379

### 380 **Acknowledgments**

381 We thank Xiong Ji (Peking University, Beijing) for help with Chromatin Immunoprecipitation  
382 Sequencing (ChIP-seq) and Transposase-Accessible Chromatin with high throughput  
383 sequencing (ATAC-seq). This work was supported by the National Key Research and  
384 Development Program of China (2016YFA0500300; 2020YFA0707800), the National  
385 Natural Science Foundation of China (31570891; 31872736; 32022028; 81991505;

386 32000113), Peking University Clinical + X (PKU2020LCXQ009) and the Peking University  
387 Medicine Fund (PKU2020LCXQ009).

388

### 389 **Author Contributions**

390 F.Y. designed the study and revised the paper. L.C., YF.L., YJ.L., XF.G., S.L., M.Z., Y.Z.,  
391 wrote the paper, performed experiments and analyzed the data. X.J. provided technical  
392 support and contributed to imaging. X.G., F.G., Q.Z. provided expertise.

393

### 394 **Declaration of Interests**

395 The authors declare no competing interests.

396

### 397 **Figure legends**

#### 398 **Figure 1 with figure supplement 1 - source data 1**

#### 399 **SAFA deficiency decreased the chromatin accessibility of antiviral immune genes**

400 (A) Heatmap showing the ATAC-seq signal in Wild-type (WT) and *SAFA*<sup>-/-</sup> THP-1 cells with  
401 VSV infection for 6 hours.

402 (B) Line graph showing SAFA in regulation of VSV-induced accessible locus and  
403 housekeeping locus in ATAC-seq.

404 (C) GO term enrichment analysis of genes significantly affected by SAFA depletion in  
405 ATAC-seq.

406 (D) Violin graph showing ISGs affected by SAFA depletion in ATAC-seq.

407 (E) Genome browser views of ATAC-seq signal for the indicated genes.

408 (F) Transcription factor enrichment analysis of ATAC-seq.

409 (G) Heatmap comparing ATAC-seq signal and RNA-seq signal of indicated genes.

410 \*\*\* $p < 0.001$ , \*\*\*\* $p < 0.0001$  (Student's t test; D). Data were pooled from two independent  
411 experiments (A-D, F and G). Data were representative of two independent experiments  
412 (E).

413

#### 414 **Figure 2 with figure supplement 2**

#### 415 **SAFA deficiency decreased the activation of antiviral immune genes**

416 (A) Heatmap showing the ChIP-seq signal enrichment around the TSSs of H3K27ac in WT  
417 and *SAFA*<sup>-/-</sup> THP-1 cells with VSV infection for 8 or 24 hours.

418 (B) GO term enrichment analysis of enhancers-related genes affected by SAFA depletion  
419 in ChIP -seq.

420 (C) Delineation of super-enhancers based on H3K27Ac occupancy in WT and *SAFA*<sup>-/-</sup>  
421 THP-1 cells with VSV infection using the ROSE algorithm.

422 (D) Line graph showing SAFA in regulation of VSV-induced and housekeeping super-  
423 enhancer formation.

424 (E) GO term enrichment analysis of super-enhancers related genes affected by SAFA  
425 depletion in ChIP -seq.

426 (F) Genome browser views of ChIP -seq signal for the indicated genes.

427 Data were pooled from two independent experiments (A-E). Data were representative of  
428 two independent experiments (F).

429

### 430 **Figure 3 with figure supplement 3 - source data 3**

#### 431 **RNA binding activity of SAFA is critical for increasing the accessibility of anti-viral** 432 **chromatin**

433 (A) Models depicting the ATAC-seq and RNA-seq assay in Flag-SAFA and Flag-Del-RGG  
434 stably expressed *SAFA*<sup>-/-</sup> THP-1 cells with VSV infection for 6 hours.

435 (B) Heatmap showing the ATAC-seq signal.

436 (C) GO term enrichment analysis of genes significantly affected by RGG domain depletion  
437 in ATAC-seq.

438 (D) Genome browser views of ATAC-seq signal for the indicated genes.

439 (E) Violin graph showing ISGs affected by RGG domain depletion in ATAC-seq.

440 (F) Transcription factor enrichment analysis of ATAC-seq.

441 (G) Heatmap showing RNA-seq signal for the indicated genes.

442 \*\*\**p* < 0.001, \*\*\*\**p* < 0.0001 (Student's t test; E). Data were pooled from two independent  
443 experiments (B, C and E-G). Data were representative of two independent experiments

444 (D).

445

446 **Figure 4 with figure supplement 4**

447 **SAFA interacted with antiviral related RNAs in a time-dependent manner during viral**  
448 **infection**

449 (A) Scatter diagram showing differential RNA binding profiles of SAFA in THP-1 cells with  
450 VSV infection for 6 hours or 24 hours.

451 (B) Pie chart showing the changes of RNAs interacted with SAFA in RIP-seq upon VSV  
452 infection (left); pie chart showing the distribution profile of RNAs with increased interaction  
453 with SAFA after VSV infection (right).

454 (C) GO term enrichment analysis of RNAs interacted with SAFA in RIP-seq.

455 (D) Heatmap showing RIP-seq signal for the indicated RNAs.

456 (E) Line graph showing time-dependent RNA binding manner of indicated genes with VSV  
457 infection for indicated times.

458 Data were pooled from two independent experiments (A-D). Data were pooled from three  
459 experiments (E).

460

461 **Figure 5 with figure supplement 5**

462 **RNA product interacted with SAFA mediated specific chromatin remodeling during**  
463 **viral infection**

464 (A) Models depicting the experiment design of knocking down RNA by CRISPR-Cas13d  
465 system and further detecting the chromatin accessibility with ATAC-qPCR after VSV  
466 infection.

467 (B) Histogram showing the knockdown efficiency of crRNA of indicated RNAs after VSV  
468 infection for 18 hours.

469 (C) ATAC-qPCR results showing the chromatin accessibility of indicated genes after the  
470 related RNA knockdown with or without VSV infection for 18 hours. Empty vector (EV) was  
471 used as control.

472 \* $p < 0.05$ , \*\* $p < 0.01$ , \*\*\* $p < 0.001$  (Student's t test, B and C). Data were pooled from three  
473 independent experiments (B and C). Error bars, SEM.  $n = 3$  cultures.

474

475 **Figure 6 with figure supplement 6 - source data 6**



476 **Virus-mediated cleavage of SAFA separates the RNA-binding domain**

477 (A) Immunoblotting results showing the expression of indicated protein in THP-1 cells  
478 infected with VSV for indicated times or BMDM infected with VSV for 4 hours.

479 (B) HEK293T cells were transfected with 3XHA-SAFA plasmids, and then infected with  
480 VSV for 4 hours followed by immunoblotting.

481 (C) THP-1 cells were infected with VSV for 4 hours followed by immunoprecipitation and  
482 coomassie brilliant blue staining. The cleaved band was cut out for mass spectrum assay.  
483 The detected amino acid sequences were marked by grey background.

484 (D) HEK293T cells were transfected with indicated plasmids, and then infected with VSV  
485 for 4 hours followed by immunoblotting.

486 (E) Models depicting VSV infection induced cleavage of SAFA.

487 (F) HEK293T cells were transfected with indicated plasmids before infection with VSV for  
488 24 hours and then type I interferons in the supernatants were detected by bioassay.

489 (G-I) THP-1 mutants generated by overexpressing indicated lentivirus plasmids were  
490 infected with VSV for 24 hours and the expression levels of *IFNB* (G) and *CXCL10*, *ISG15*  
491 (H) were detected by qPCR. The viral load was detected by plaque assay (I).

492 \* $P < 0.05$ , \*\* $P < 0.01$  and \*\*\* $P < 0.001$  (Student's t-test). Data were representative of three  
493 independent experiments (A-D). Data were pooled from 3 independent experiments (F-I).  
494 Error bars, SEM. n = 3 cultures.

495

496

497 **STAR★Methods**

498 **Key Resources Table**

| REAGENT or RESOURCE                                       | SOURCE               | IDENTIFIER                        |
|-----------------------------------------------------------|----------------------|-----------------------------------|
| <b>Antibodies</b>                                         |                      |                                   |
| Mouse Anti-hnRNP U (clone 3G6) antibody                   | Santa cruz           | Cat# sc-32315, RRID:AB_627741     |
| Rabbit Anti-HA antibody                                   | Sigma-Aldrich        | Cat# H3663, RRID: AB_262051       |
| Rabbit Anti-Histone H3 antibody - ChIP Grade (acetyl K27) | Abcam                | Cat# Ab4729, RRID:AB_2118291      |
| Rabbit Anti-Tubulin antibody                              | Affinity             | Cat# AF7011                       |
| Mouse anti-Histone H3 antibody                            | MBL International    | Cat# MABI0301, RRID: AB_11142498  |
| Rabbit Anti-DDDDK-tag antibody (anti-Flag)                | MBL                  | Cat# PM020, RRID:AB_591224        |
| Mouse Anti-Lamin B1 (clone 3C10G12) antibody              | Proteintech          | Cat# 66095-1-Ig, RRID:AB_11232208 |
| <b>Chemicals, Peptides, and Recombinant Proteins</b>      |                      |                                   |
| Protease inhibitor cocktail                               | TargetMol            | Cat# B14001                       |
| Pierce Protein A/G Agarose                                | Thermo               | Cat#20422                         |
| Lipofectamine 3000 Reagent                                | ThermoFisher         | Cat#L3000015                      |
| <b>Virus</b>                                              |                      |                                   |
| VSV (Vesicular Stomatitis Virus, Indiana strain)          | J. Rose (Yale Univ)  | N/A                               |
| <b>Experimental Models: Cell lines</b>                    |                      |                                   |
| Human: 293T                                               | ATCC                 | Cat#ATCC-CRL-3216                 |
| Human: 2fTGH                                              | Cao et al., 2019     | N/A                               |
| Human:THP1                                                | Zhengfan J. (Peking) | N/A                               |
| <b>Recombinant DNA</b>                                    |                      |                                   |
| Plasmid: Pcmv7.1 FLAG-SAFA                                | Cao et al., 2019     | N/A                               |
| Plasmid: Pcmv7.1 3xHA-SAFA                                | Cao et al., 2019     | N/A                               |
| Plasmid: Pcmv7.1 3xHA-Del650-675                          | This paper           | N/A                               |
| Plasmid: Pcmv7.1 3xHA- Del675-700                         | This paper           | N/A                               |
| Plasmid: Pcmv7.1 FLAG-Del650-675                          | This paper           | N/A                               |
| Plasmid: Pcmv7.1 FLAG-Del RGG                             | Cao et al., 2019     | N/A                               |
| Plasmid: Pcmv7.1 FLAG-1-675                               | This paper           | N/A                               |
| Plasmid: Pcmv7.1 FLAG-675-825                             | This paper           | N/A                               |
| Plasmid: Plvx FLAG-SAFA                                   | This paper           | N/A                               |
| Plasmid: Plvx FLAG-Del 650-675                            | This paper           | N/A                               |
| Plasmid: Plvx FLAG-Del RGG                                | This paper           | N/A                               |
| pCMV-VSV-G                                                | AddGene              | Cat#8454                          |
| psPAX2                                                    | AddGene              | Cat#12260                         |
| pXR003: CasRx gRNA cloning backbone                       | AddGene              | Cat#109053                        |
| pXR001: EF1a-CasRx-2A-EGFP                                | AddGene              | #109049                           |
| Human IFNB1-Promoter-Luci:                                | Cao et al., 2019     | N/A                               |

## 500 **Lead Contact and Materials Availability**

501 *Further information and requests for reagents may be directed to, and will be fulfilled by the corresponding*  
502 *author Fuping You ([fupingyou@hsc.pku.edu.cn](mailto:fupingyou@hsc.pku.edu.cn)).*

503

## 504 **Experimental Model and Subject Details**

### 505 **Cells**

506 THP-1 cell was a gift from Zhengfan Jiang (Peking University). 2fTGH-ISRE cell (human  
507 fibrosarcoma cell expressing an ISRE driven luciferase reporter) was generated by  
508 stabilizing ISRE-luciferase plasmid in 2fTGH cell. Isolation of BMDM (bone-marrow derived  
509 macrophages) was performed as described (Cao et al., 2019a). *SAFA*<sup>-/-</sup>, *MAVS*<sup>-/-</sup>, *IRF3*<sup>-/-</sup>  
510 THP-1 cells were constructed by CRISPR-Cas9 system as previously reported (Cao et al.,  
511 2019a). Cells were cultured in Dulbecco's Modified Eagle's Medium (DMEM)  
512 supplemented with 10% FBS, 100 U/mL Penicillin-Streptomycin. Cells were negative for  
513 mycoplasma.

### 514 **Constructs**

515 Expression constructs generated for this study were prepared by standard molecular  
516 biology techniques and coding sequences were entirely verified. All the deletions and  
517 mutants were constructed by standard molecular biology technique. Each construct was  
518 confirmed by sequencing.

### 519 **Method Details**

#### 520 **Type I IFN Bioassay**

521 Type I IFN bioassay was performed as previously reported (Cao et al., 2019a). Type I  
522 IFNs in human cell culture medium were quantified using a 2fTGH-ISRE cell line stably  
523 expressing an ISRE-Luci reporter. In brief, 200 mL of culture medium was incubated with  
524 confluent 2fGTH-ISRE-Luci cells (24-well plate) for 6 hours. Cells were lysed in passive  
525 lysis buffer and subjected to luciferase quantification (Promega). A serial dilution of human  
526 IFN $\beta$  was included as standards.

#### 527 **Luciferase Reporter Assay**

528 Luciferase reporter assay was performed as previously reported (Cao et al., 2019b).  
529 HEK293T cells seeded on 24-well plates were transiently transfected with 50 ng of the

530 luciferase reporter plasmid together with a total of equal amount of indicated expression  
531 plasmids or empty control (EV) plasmid. As an internal control, 10 ng pRL-TK was  
532 transfected simultaneously. Reporter gene activity was analyzed using the Dual-Luciferase  
533 Reporter 1000 Assay System (Promega) and measured with a TD-20/20 Luminometer  
534 (Turner Designs) according to the manufacturers' instructions.

### 535 **Plaque Assays**

536 Viral titers from the cell culture medium were determined by plaque-forming assays as  
537 previously described (35). Briefly, virus-containing medium was serially diluted and then  
538 added to confluent Vero cells. After incubation for 1 hour, supernatants were removed, cells  
539 were washed with PBS, and culture medium containing 2% (wt/vol) methylcellulose was  
540 overlaid for 24 hours. Then cells were fixed for 30 minutes with 0.5% (vol/vol)  
541 glutaraldehyde and then stained with 1% (wt/vol) crystal violet dissolved in 70% ethanol  
542 for 30 minutes. After washing twice with ddH<sub>2</sub>O, plaques were counted, and average  
543 counts were multiplied by the dilution factor to determine the viral titer as plaque-forming  
544 units per milliliter.

### 545 **Western blotting**

546 Cells were harvested and lysed with Pierce lysis buffer (25 mM Tris·HCl, pH 7.4, 150  
547 mM NaCl, 1 mM EDTA, 1% NP-40, 5% β-Mercaptoethanol) with the protease inhibitor  
548 cocktail (Roche) on ice for 30 minutes. Supernatants were collected by centrifugation at  
549 12,000 rpm for 10 minutes at 4°C. Cell lysates were boiled with loading buffer. Each protein  
550 sample was loaded onto 8 % SDS-PAGE. After electrophoresis, proteins were transferred  
551 to the nitrocellulose membrane (Millipore). The membrane was blocked with 5% milk (in  
552 PBST) for 1 hour, and incubated sequentially with primary and HRP-coupled secondary  
553 antibodies. After being washed with PBST for 3 times, the membranes were visualized by  
554 enhanced chemiluminescence (Millipore).

### 555 **Coomassie brilliant blue staining**

556 Samples pulled down with SAFA antibody were analyzed with SDS-PAGE. After staining  
557 with Coomassie brilliant blue R-250, the target bands on the PAGE gel were visualized and  
558 excised for mass spectrometry.

### 559 **RNA knockdown**

560 RNA knockdown was performed by CRISPR-Cas13d system. Specific CRISPR RNAs  
561 (crRNAs) were annealed and ligated into CasRx gRNA cloning backbone (addgene,  
562 #109053). CrRNA plasmids (2 ug) and plasmids coding CasRx (addgene, #109049) were  
563 transfected into HEK293T cells together (6-well plate). The medium was changed to fresh  
564 DMEM containing 10% FBS at 6 hours post transfection. After transfection for 48 hours,  
565 GFP-highly positive cells were sorted by using fluorescence-activated cell sorting (FACS)  
566 and used for further experiment. The crRNAs used were listed in the table S1.

#### 567 **Quantitative real-time PCR (qRT-PCR)**

568 Total RNA was isolated using the RNA simple Total RNA kit (TIANGEN). 1 ug RNA was  
569 reverse transcribed using a FastKing RT Kit (TIANGEN). Levels of the indicated genes  
570 were analyzed by qRT-PCR amplified using SYBR Green (Transgene). Data shown are  
571 the relative abundance of the indicated mRNA normalized to *Actin*. The primers used were  
572 listed in the table S2.

#### 573 **ATAC-seq**

574 Pellet 50,000 viable sample cells at 500 RCF at 4°C for 5 min. Aspirate all supernatant.  
575 Add 50 µL cold ATAC-Resuspension Buffer (RSB) containing 0.1% NP40, 0.1% Tween-20,  
576 and 0.01% Digitonin into the cell pellet and pipette up and down 3 times. Incubate on ice  
577 for 3 minutes. Wash out lysis with 1 mL cold ATAC-RSB containing 0.1% Tween-20 but no  
578 NP40 or digitonin and invert tube 3 times to mix. Pellet nuclei at 500 RCF for 10 min at 4°C.  
579 Aspirate all supernatant. Resuspend cell pellet in 50 µL of transposition mixture (25 µL 2x  
580 TD buffer, 2.5 µL transposase (100 nM final), 16.5 µL PBS, 0.5 µL 1% digitonin, 0.5 µL 10%  
581 Tween-20, 5 µL H<sub>2</sub>O) by pipetting up and down 6 times. Incubate reaction at 37°C for 30  
582 minutes. Afterward, the DNA was purified with Magen DNA purify kit and amplified with  
583 primers containing barcodes by using the TruePrep DNA Library Prep Kit (TD501-01). All  
584 libraries were adapted for sequencing.

#### 585 **ATAC-qPCR**

586 The ATAC libraries were adapted for qRT-PCR with specific primers. The primers used  
587 were listed in the table S3.

#### 588 **RNA-seq**

589 Bulk RNA-sequencing (RNA-seq) was conducted as previously described (Cao et al.,

590 2019a). The original data of the RNA-seq was uploaded to the GEO DataSets.

#### 591 **RIP-seq**

592 RNA immunoprecipitation sequencing (RIP-seq) was conducted as previously described  
593 (Cao et al., 2019a). The original data of the RIP-seq was uploaded to the GEO DataSets.

#### 594 **ChIP-seq**

595 Chromatin immunoprecipitation followed by sequencing (ChIP-seq) and data analysis  
596 were conducted as previously described (Cao et al., 2019a). The original data of the ChIP-  
597 seq was uploaded to the GEO DataSets.

#### 598 **Statistical Analysis**

599 For all the bar graphs, data were expressed as means  $\pm$  SEM. Prism 8 software (graphic  
600 software) was used for charts, and statistical analyses. Differences in means were  
601 considered statistically significant at  $p < 0.05$ . Significance levels are: \*  $p < 0.05$ ; \*\*  $p <$   
602  $0.01$ ; \*\*\*  $p < 0.001$ ; \*\*\*\*  $p < 0.0001$ ; NS., non-significant.

#### 603 **Data availability**

604 ATAC-seq, ChIP-seq, RNA-seq and Rip-seq relevant data are available at the DRYAD  
605 database: <https://doi.org/10.5061/dryad.0rxwdb0w>.

606

#### 607 **Tables**

608 Table S1: CrRNA sequence

609 Table S2. Primers for qRT-PCR

610 Table S3. Primers for RT-PCR and ATAC-qRT-PCR

611

612

## 613 **References**

- 614 Agarwal, S., and Rao, A. (1998). Modulation of chromatin structure regulates cytokine gene  
615 expression during T cell differentiation. *Immunity* *9*, 765-775.
- 616 Akira, S., and Takeda, K. (2004). Toll-like receptor signalling. *Nat Rev Immunol* *4*, 499-511.
- 617 Bao, X., Liu, Z., Zhang, W., Gladysz, K., Fung, Y.M.E., Tian, G., Xiong, Y., Wong, J.W.H., Yuen, K.W.Y.,  
618 and Li, X.D. (2019). Glutarylation of Histone H4 Lysine 91 Regulates Chromatin Dynamics. *Mol Cell*  
619 *76*, 660-675 e669.
- 620 Belmont, A.S. (2014). Large-scale chromatin organization: the good, the surprising, and the still  
621 perplexing. *Curr Opin Cell Biol* *26*, 69-78.
- 622 Beutler, B. (2004). Innate immunity: an overview. *Mol Immunol* *40*, 845-859.
- 623 Bonev, B., and Cavalli, G. (2016). Organization and function of the 3D genome. *Nat Rev Genet* *17*,  
624 661-678.
- 625 Cao, L., Liu, S., Li, Y., Yang, G., Luo, Y., Li, S., Du, H., Zhao, Y., Wang, D., Chen, J., *et al.* (2019a). The  
626 Nuclear Matrix Protein SAFA Surveils Viral RNA and Facilitates Immunity by Activating Antiviral  
627 Enhancers and Super-enhancers. *Cell Host Microbe* *26*, 369-384 e368.
- 628 Cao, L., Yang, G., Gao, S., Jing, C., Montgomery, R.R., Yin, Y., Wang, P., Fikrig, E., and You, F. (2019b).  
629 HIPK2 is necessary for type I interferon-mediated antiviral immunity. *Sci Signal* *12*.
- 630 Caudron-Herger, M., and Rippe, K. (2012). Nuclear architecture by RNA. *Curr Opin Genet Dev* *22*,  
631 179-187.
- 632 Crawford, A., Angelosanto, J.M., Nadwodny, K.L., Blackburn, S.D., and Wherry, E.J. (2011). A role  
633 for the chemokine RANTES in regulating CD8 T cell responses during chronic viral infection. *PLoS*  
634 *Pathog* *7*, e1002098.
- 635 Cremer, T., and Cremer, M. (2010). Chromosome territories. *Cold Spring Harb Perspect Biol* *2*,  
636 a003889.
- 637 Creighton, M.P., Cheng, A.W., Welstead, G.G., Kooistra, T., Carey, B.W., Steine, E.J., Hanna, J.,  
638 Lodato, M.A., Frampton, G.M., Sharp, P.A., *et al.* (2010). Histone H3K27ac separates active from  
639 poised enhancers and predicts developmental state. *Proc Natl Acad Sci U S A* *107*, 21931-21936.
- 640 Deuring, R., Fanti, L., Armstrong, J.A., Sarte, M., Papoulas, O., Prestel, M., Daubresse, G., Verardo,  
641 M., Moseley, S.L., Berloco, M., *et al.* (2000). The ISWI chromatin-remodeling protein is required for  
642 gene expression and the maintenance of higher order chromatin structure in vivo. *Mol Cell* *5*, 355-  
643 365.
- 644 Djebali, S., Davis, C.A., Merkel, A., Dobin, A., Lassmann, T., Mortazavi, A., Tanzer, A., Lagarde, J., Lin,  
645 W., Schlesinger, F., *et al.* (2012). Landscape of transcription in human cells. *Nature* *489*, 101-108.
- 646 Dong, A., Preusch, C.B., So, W.K., Lin, K., Luan, S., Yi, R., Wong, J.W., Wu, Z., and Cheung, T.H. (2020).  
647 A long noncoding RNA, LncMyoD, modulates chromatin accessibility to regulate muscle stem cell  
648 myogenic lineage progression. *Proc Natl Acad Sci U S A* *117*, 32464-32475.
- 649 Erzberger, J.P., and Berger, J.M. (2006). Evolutionary relationships and structural mechanisms of  
650 AAA+ proteins. *Annu Rev Biophys Biomol Struct* *35*, 93-114.
- 651 Fackelmayer, F.O., Dahm, K., Renz, A., Ramsperger, U., and Richter, A. (1994). Nucleic-acid-binding  
652 properties of hnRNP-U/SAF-A, a nuclear-matrix protein which binds DNA and RNA in vivo and in  
653 vitro. *Eur J Biochem* *221*, 749-757.
- 654 Fan, H., Lv, P., Huo, X., Wu, J., Wang, Q., Cheng, L., Liu, Y., Tang, Q.Q., Zhang, L., Zhang, F., *et al.*

655 (2018). The nuclear matrix protein HNRNPU maintains 3D genome architecture globally in mouse  
656 hepatocytes. *Genome Res* *28*, 192-202.

657 Gendrel, A.V., and Heard, E. (2014). Noncoding RNAs and epigenetic mechanisms during X-  
658 chromosome inactivation. *Annu Rev Cell Dev Biol* *30*, 561-580.

659 Geuens, T., Bouhy, D., and Timmerman, V. (2016). The hnRNP family: insights into their role in  
660 health and disease. *Hum Genet* *135*, 851-867.

661 Govin, J., Caron, C., Lestrat, C., Rousseaux, S., and Khochbin, S. (2004). The role of histones in  
662 chromatin remodelling during mammalian spermiogenesis. *Eur J Biochem* *271*, 3459-3469.

663 Gupta, R.A., Shah, N., Wang, K.C., Kim, J., Horlings, H.M., Wong, D.J., Tsai, M.C., Hung, T., Argani,  
664 P., Rinn, J.L., *et al.* (2010). Long non-coding RNA HOTAIR reprograms chromatin state to promote  
665 cancer metastasis. *Nature* *464*, 1071-1076.

666 Han, P., and Chang, C.P. (2015). Long non-coding RNA and chromatin remodeling. *RNA Biol* *12*,  
667 1094-1098.

668 Hao, S.L., Ni, F.D., and Yang, W.X. (2019). The dynamics and regulation of chromatin remodeling  
669 during spermiogenesis. *Gene* *706*, 201-210.

670 Henninger, J.E., Oksuz, O., Shrinivas, K., Sagi, I., LeRoy, G., Zheng, M.M., Andrews, J.O., Zamudio,  
671 A.V., Lazaris, C., Hannett, N.M., *et al.* (2021). RNA-Mediated Feedback Control of Transcriptional  
672 Condensates. *Cell* *184*, 207-225 e224.

673 Hnisz, D., Abraham, B.J., Lee, T.I., Lau, A., Saint-Andre, V., Sigova, A.A., Hoke, H.A., and Young, R.A.  
674 (2013). Super-enhancers in the control of cell identity and disease. *Cell* *155*, 934-947.

675 Huo, X., Ji, L., Zhang, Y., Lv, P., Cao, X., Wang, Q., Yan, Z., Dong, S., Du, D., Zhang, F., *et al.* (2020).  
676 The Nuclear Matrix Protein SAFB Cooperates with Major Satellite RNAs to Stabilize  
677 Heterochromatin Architecture Partially through Phase Separation. *Mol Cell* *77*, 368-383 e367.

678 Jagdeo, J.M., Dufour, A., Fung, G., Luo, H., Kleifeld, O., Overall, C.M., and Jan, E. (2015).  
679 Heterogeneous Nuclear Ribonucleoprotein M Facilitates Enterovirus Infection. *J Virol* *89*, 7064-  
680 7078.

681 Juven-Gershon, T., and Kadonaga, J.T. (2010). Regulation of gene expression via the core promoter  
682 and the basal transcriptional machinery. *Dev Biol* *339*, 225-229.

683 Kim, S., and Kaang, B.K. (2017). Epigenetic regulation and chromatin remodeling in learning and  
684 memory. *Exp Mol Med* *49*, e281.

685 Klemm, S.L., Shipony, Z., and Greenleaf, W.J. (2019). Chromatin accessibility and the regulatory  
686 epigenome. *Nat Rev Genet* *20*, 207-220.

687 Kolpa, H.J., Fackelmayer, F.O., and Lawrence, J.B. (2016). SAF-A Requirement in Anchoring XIST  
688 RNA to Chromatin Varies in Transformed and Primary Cells. *Dev Cell* *39*, 9-10.

689 Kushawah, G., Hernandez-Huertas, L., Abugattas-Nunez Del Prado, J., Martinez-Morales, J.R.,  
690 DeVore, M.L., Hassan, H., Moreno-Sanchez, I., Tomas-Gallardo, L., Diaz-Moscoso, A., Monges, D.E.,  
691 *et al.* (2020). CRISPR-Cas13d Induces Efficient mRNA Knockdown in Animal Embryos. *Dev Cell* *54*,  
692 805-817 e807.

693 Lanctot, C., Cheutin, T., Cremer, M., Cavalli, G., and Cremer, T. (2007). Dynamic genome  
694 architecture in the nuclear space: regulation of gene expression in three dimensions. *Nat Rev*  
695 *Genet* *8*, 104-115.

696 Lieberman-Aiden, E., van Berkum, N.L., Williams, L., Imakaev, M., Ragoczy, T., Telling, A., Amit, I.,  
697 Lajoie, B.R., Sabo, P.J., Dorschner, M.O., *et al.* (2009). Comprehensive mapping of long-range  
698 interactions reveals folding principles of the human genome. *Science* *326*, 289-293.



- 699 Lin, H., and Cao, X. (2020). Nuclear innate sensors for nucleic acids in immunity and inflammation.  
700 *Immunol Rev* *297*, 162-173.
- 701 Loo, Y.M., and Gale, M., Jr. (2011). Immune signaling by RIG-I-like receptors. *Immunity* *34*, 680-  
702 692.
- 703 Masliah-Planchon, J., Bieche, I., Guinebretiere, J.M., Bourdeaut, F., and Delattre, O. (2015). SWI/SNF  
704 chromatin remodeling and human malignancies. *Annu Rev Pathol* *10*, 145-171.
- 705 Meylan, E., and Tschoopp, J. (2008). IRAK2 takes its place in TLR signaling. *Nat Immunol* *9*, 581-582.
- 706 Morris, K.V., and Mattick, J.S. (2014). The rise of regulatory RNA. *Nat Rev Genet* *15*, 423-437.
- 707 Mousavi, K., Zare, H., Dell'orso, S., Grontved, L., Gutierrez-Cruz, G., Derfoul, A., Hager, G.L., and  
708 Sartorelli, V. (2013). eRNAs promote transcription by establishing chromatin accessibility at defined  
709 genomic loci. *Mol Cell* *51*, 606-617.
- 710 Nguyen, C.T., Gonzales, F.A., and Jones, P.A. (2001). Altered chromatin structure associated with  
711 methylation-induced gene silencing in cancer cells: correlation of accessibility, methylation,  
712 MeCP2 binding and acetylation. *Nucleic Acids Res* *29*, 4598-4606.
- 713 Nozawa, R.S., Boteva, L., Soares, D.C., Naughton, C., Dun, A.R., Buckle, A., Ramsahoye, B., Bruton,  
714 P.C., Saleeb, R.S., Arnedo, M., *et al.* (2017). SAF-A Regulates Interphase Chromosome Structure  
715 through Oligomerization with Chromatin-Associated RNAs. *Cell* *169*, 1214-1227 e1218.
- 716 Ong, C.T., and Corces, V.G. (2011). Enhancer function: new insights into the regulation of tissue-  
717 specific gene expression. *Nat Rev Genet* *12*, 283-293.
- 718 Pope, B.D., Ryba, T., Dileep, V., Yue, F., Wu, W., Denas, O., Vera, D.L., Wang, Y., Hansen, R.S.,  
719 Canfield, T.K., *et al.* (2014). Topologically associating domains are stable units of replication -timing  
720 regulation. *Nature* *515*, 402-405.
- 721 Pott, S., and Lieb, J.D. (2015). What are super-enhancers? *Nat Genet* *47*, 8-12.
- 722 Rinn, J.L., Kertesz, M., Wang, J.K., Squazzo, S.L., Xu, X., Bruggmann, S.A., Goodnough, L.H., Helms,  
723 J.A., Farnham, P.J., Segal, E., *et al.* (2007). Functional demarcation of active and silent chromatin  
724 domains in human HOX loci by noncoding RNAs. *Cell* *129*, 1311-1323.
- 725 Roden, C., and Gladfelter, A.S. (2021). RNA contributions to the form and function of biomolecular  
726 condensates. *Nat Rev Mol Cell Biol* *22*, 183-195.
- 727 Romig, H., Fackelmayer, F.O., Renz, A., Ramsperger, U., and Richter, A. (1992). Characterization of  
728 SAF-A, a novel nuclear DNA binding protein from HeLa cells with high affinity for nuclear  
729 matrix/scaffold attachment DNA elements. *EMBO J* *11*, 3431-3440.
- 730 Schneider, W.M., Chevillotte, M.D., and Rice, C.M. (2014). Interferon-stimulated genes: a complex  
731 web of host defenses. *Annu Rev Immunol* *32*, 513-545.
- 732 Schoggins, J.W., and Rice, C.M. (2011). Interferon-stimulated genes and their antiviral effector  
733 functions. *Curr Opin Virol* *1*, 519-525.
- 734 Takeuchi, O., and Akira, S. (2010). Pattern recognition receptors and inflammation. *Cell* *140*, 805-  
735 820.
- 736 Taniguchi, T., Ogasawara, K., Takaoka, A., and Tanaka, N. (2001). IRF family of transcription factors  
737 as regulators of host defense. *Annu Rev Immunol* *19*, 623-655.
- 738 Tsompana, M., and Buck, M.J. (2014). Chromatin accessibility: a window into the genome.  
739 *Epigenetics Chromatin* *7*, 33.
- 740 Venkatesh, S., and Workman, J.L. (2015). Histone exchange, chromatin structure and the regulation  
741 of transcription. *Nat Rev Mol Cell Biol* *16*, 178-189.
- 742 Wang, Y., Ning, X., Gao, P., Wu, S., Sha, M., Lv, M., Zhou, X., Gao, J., Fang, R., Meng, G., *et al.* (2017).

743 Inflammasome Activation Triggers Caspase-1-Mediated Cleavage of cGAS to Regulate Responses  
744 to DNA Virus Infection. *Immunity* *46*, 393-404.  
745 Zhao, J., Ohsumi, T.K., Kung, J.T., Ogawa, Y., Grau, D.J., Sarma, K., Song, J.J., Kingston, R.E., Borowsky,  
746 M., and Lee, J.T. (2010). Genome-wide identification of polycomb-associated RNAs by RIP-seq.  
747 *Mol Cell* *40*, 939-953.  
748

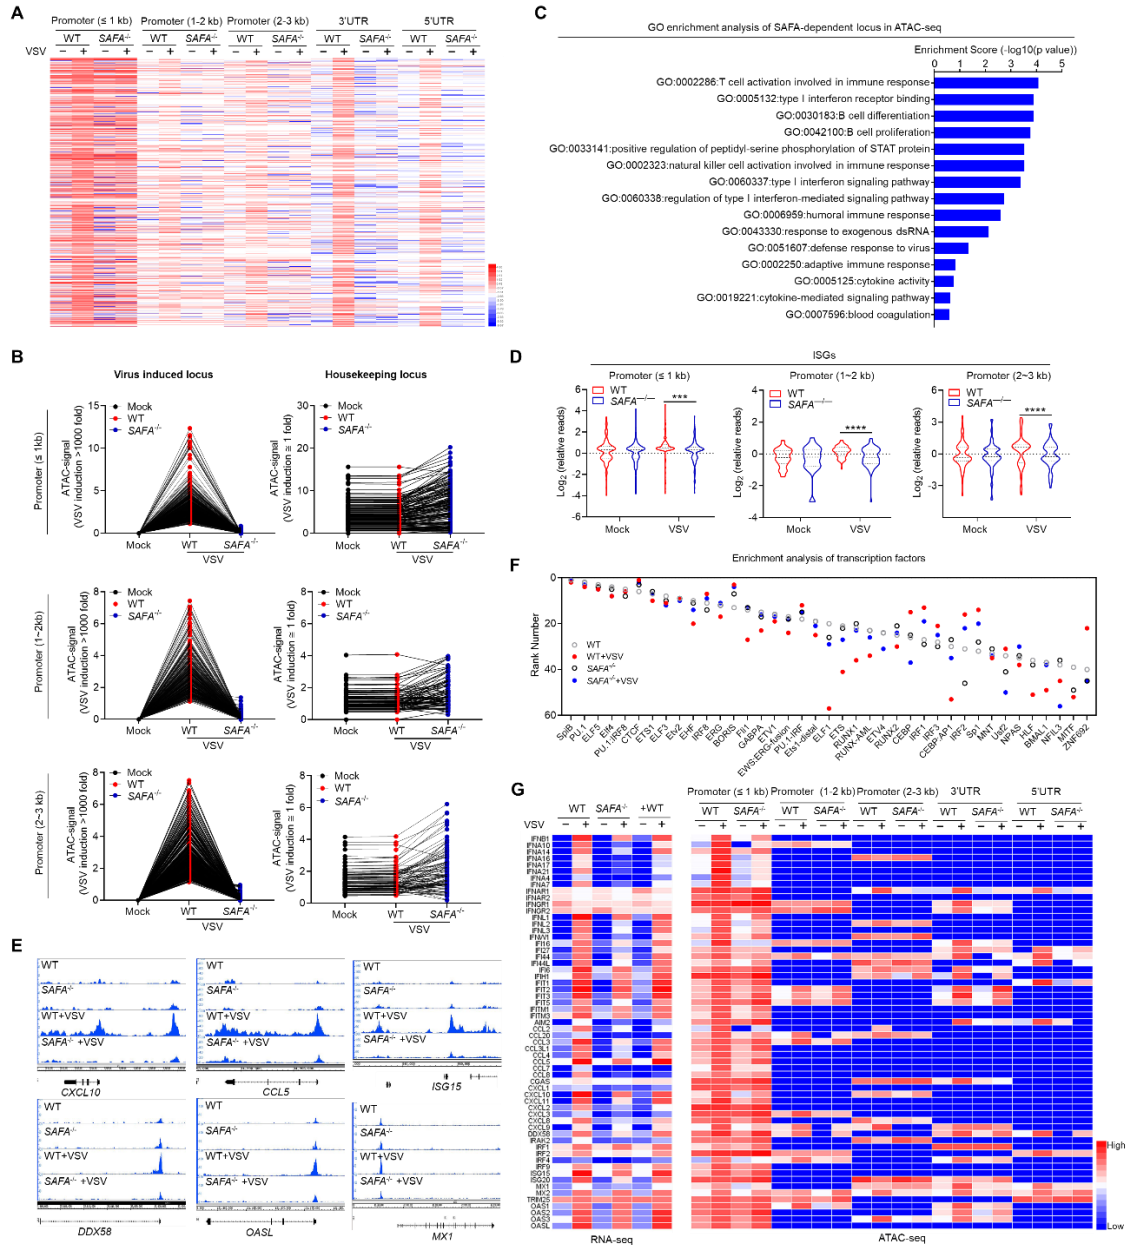

Figure 1

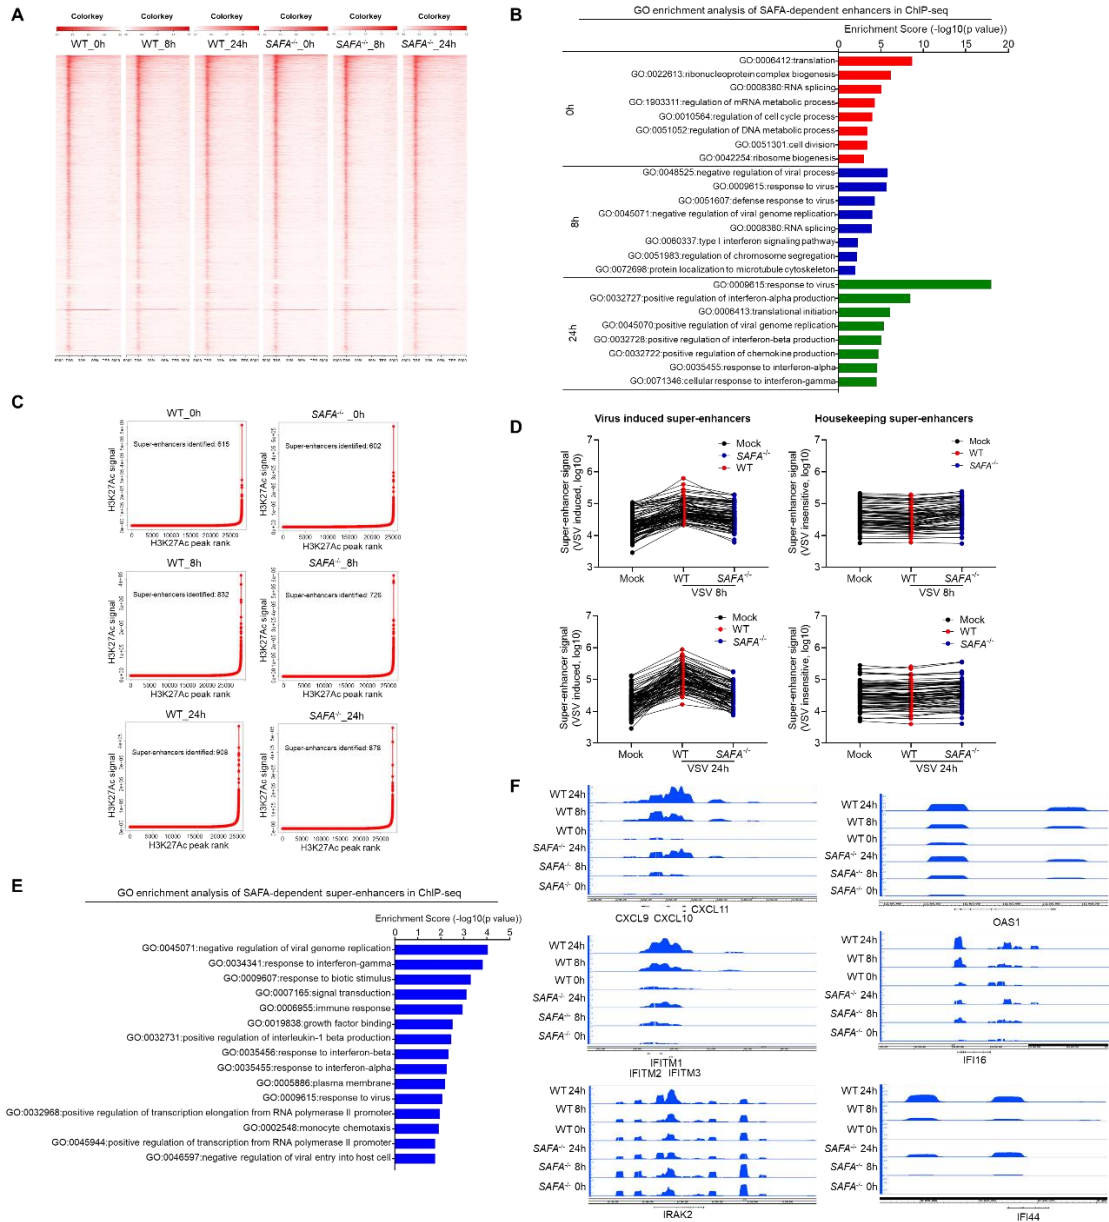

Figure 2

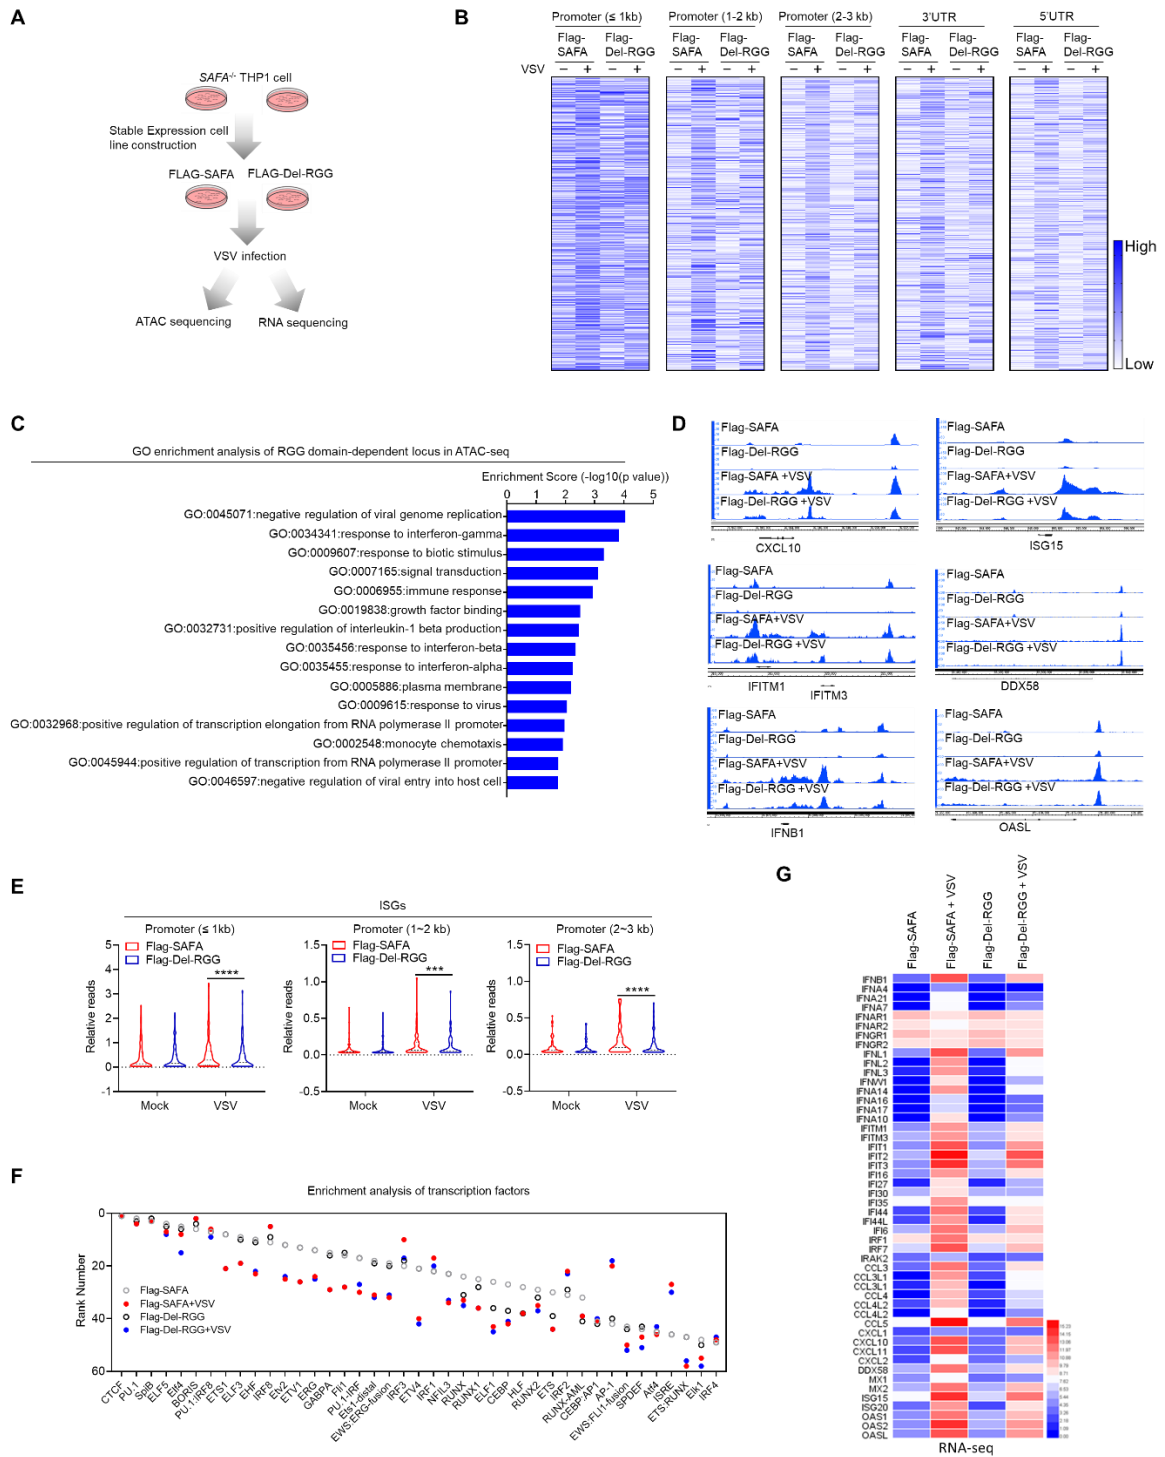

Figure 3

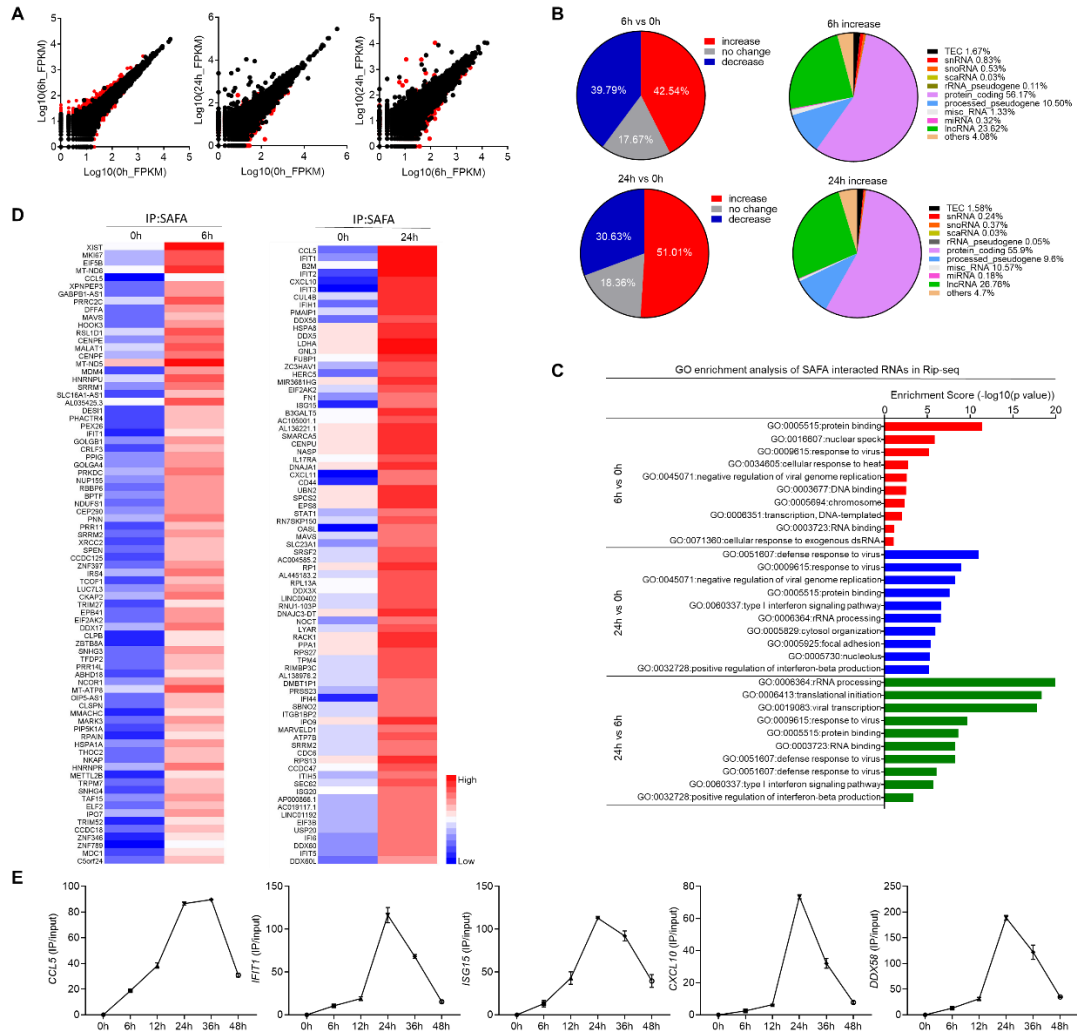

Figure 4

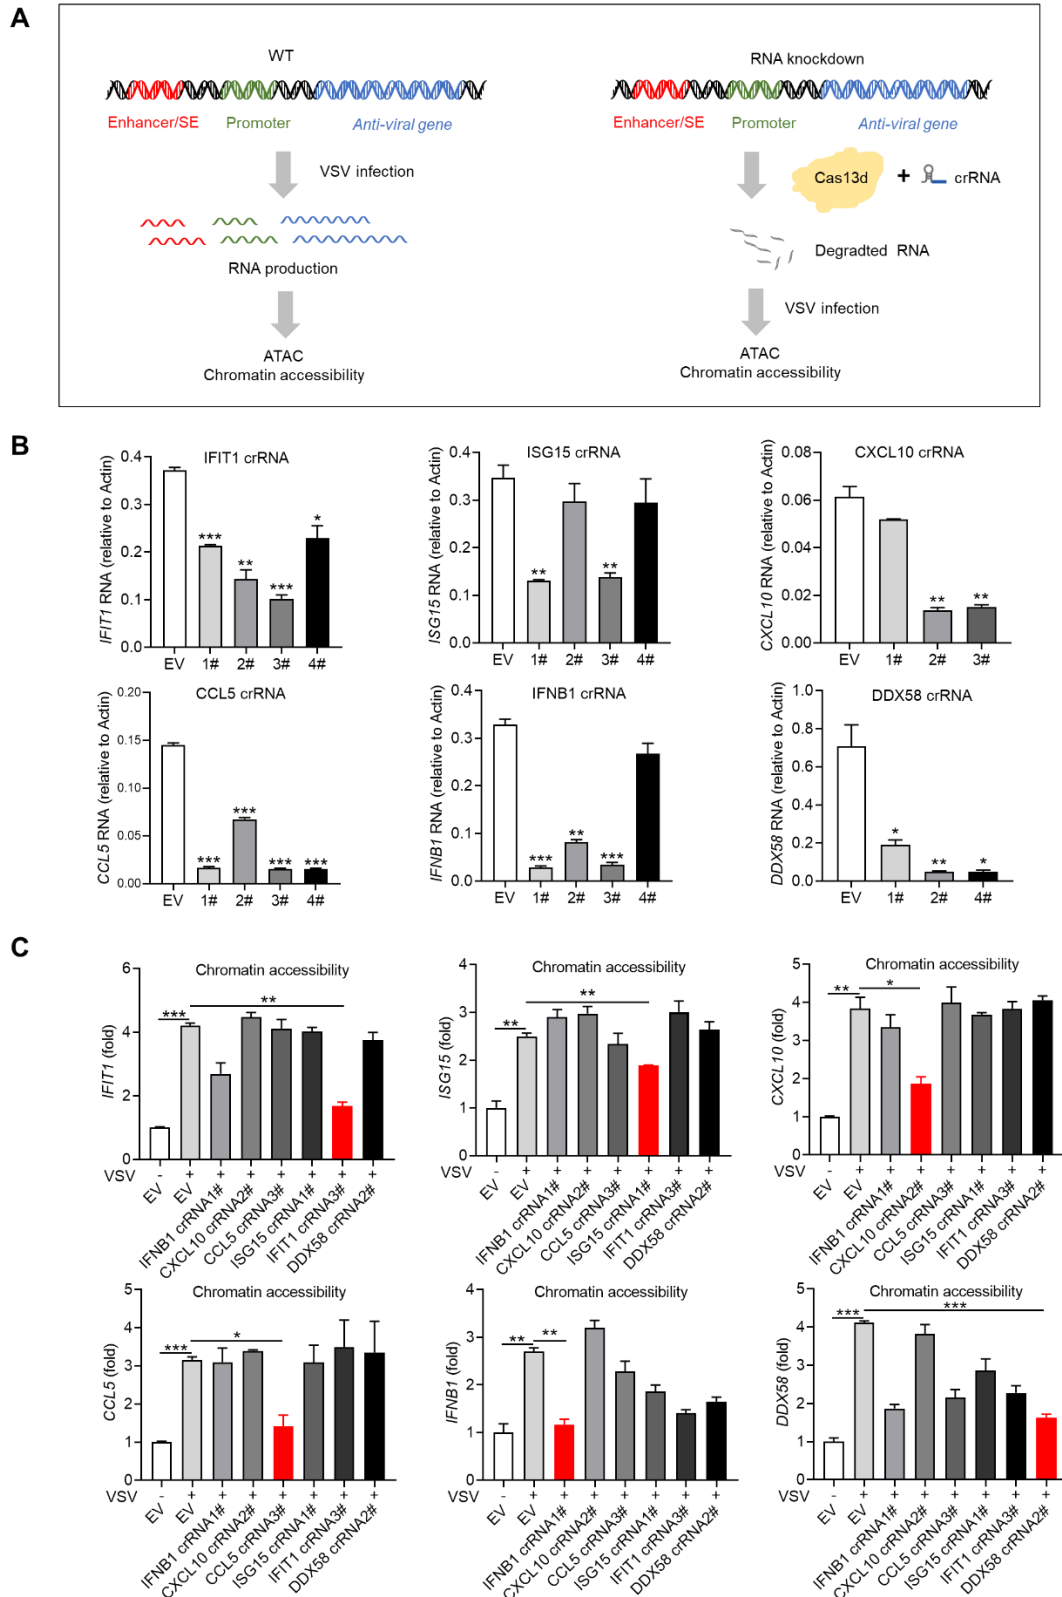

**Figure 5**

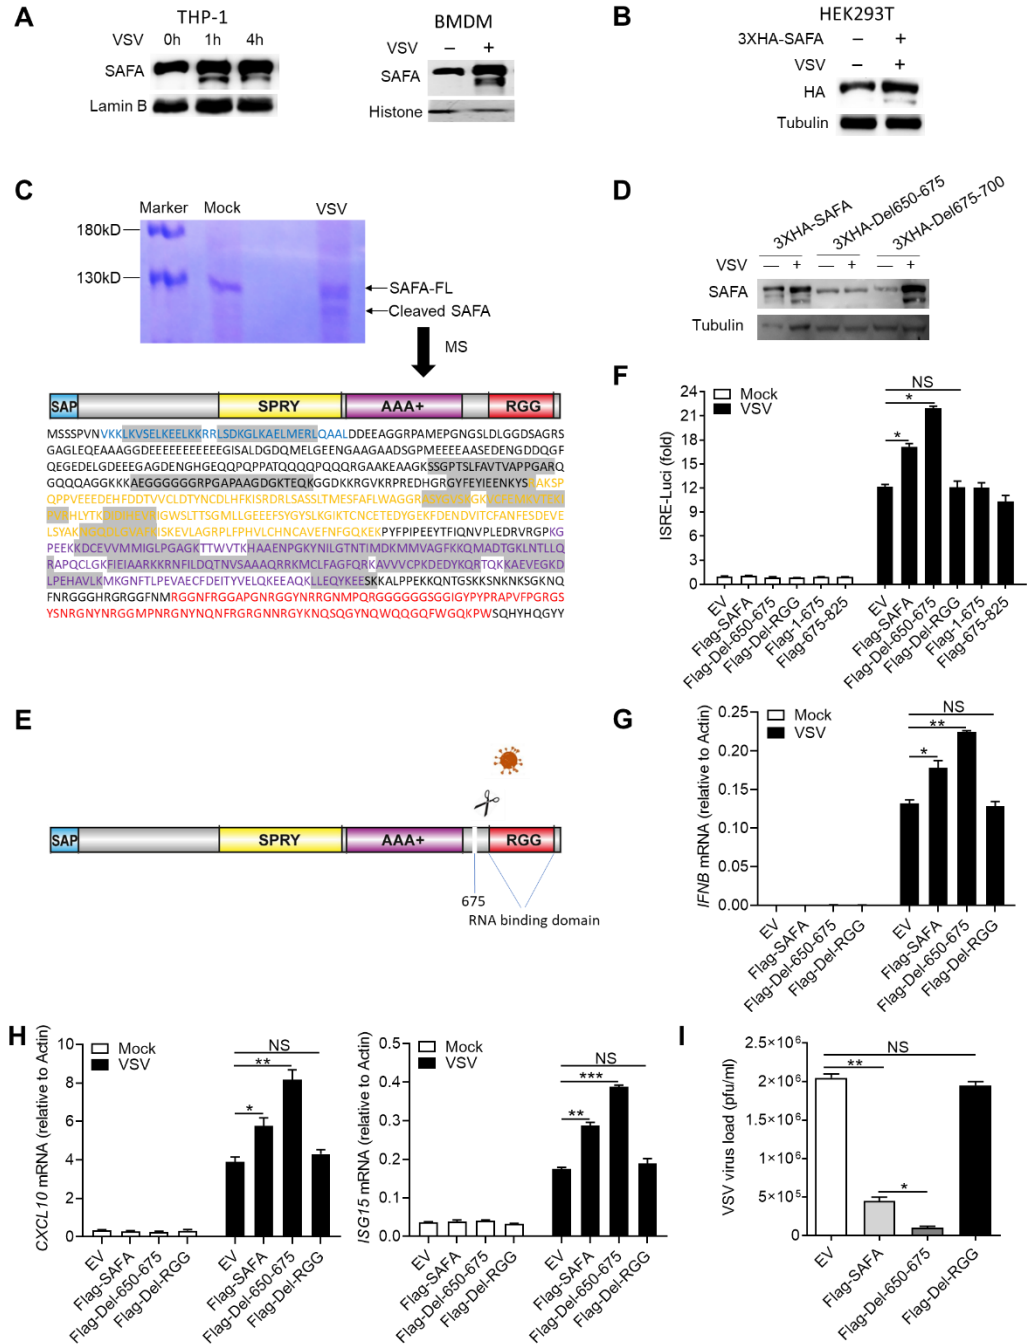

Figure 6



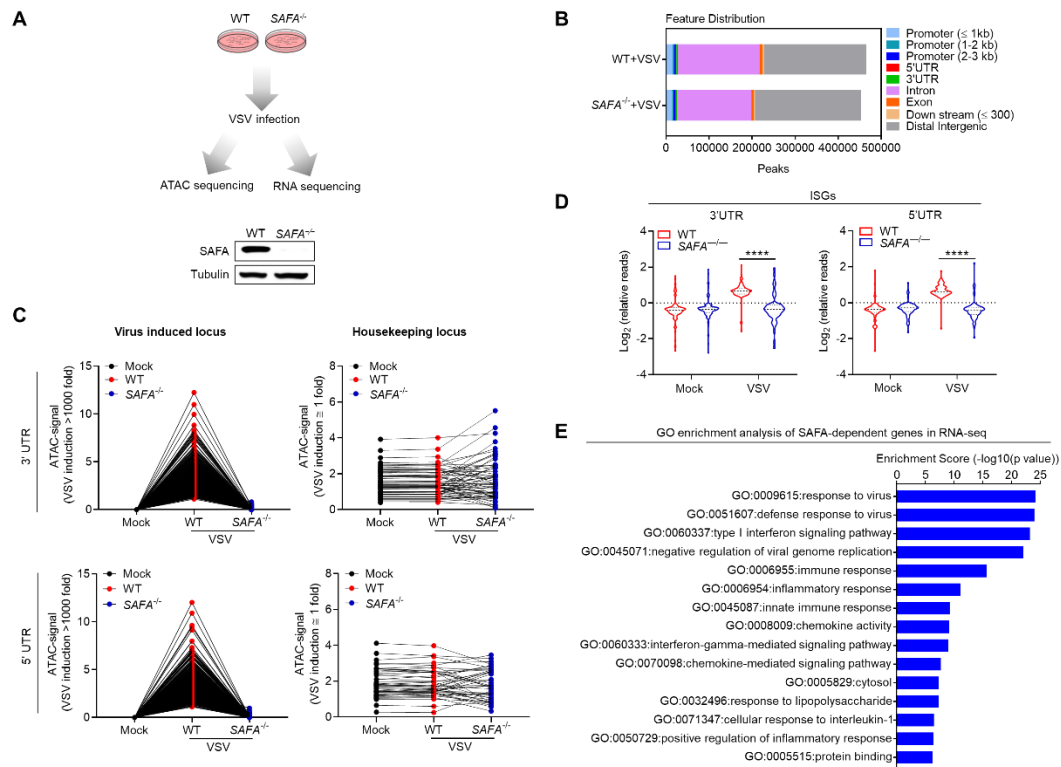

Supplementary Figure 1

755

756

**Figure S1. SAFA deficiency decreased the chromatin accessibility of antiviral immune genes**

757

758 (A) Models depicting the ATAC-seq and RNA-seq in Wild-type (WT) and SAFA<sup>-/-</sup> THP-1  
759 cells with VSV infection for 6 hours (upper), and immunoblotting results showing the  
760 knockout of SAFA in THP-1 cells (lower).

761

762 (B) Feature distribution of ATAC-seq profile after VSV infection in WT and SAFA<sup>-/-</sup> THP-1  
763 cells.

764

765 (C) Line graph showing SAFA in regulation of VSV induced accessible locus and  
766 insensitive locus.

767

768 (D) Violin graph showing ISGs affected by SAFA depletion in ATAC-seq.

769

770 (E) GO term enrichment analysis of genes significantly affected by SAFA depletion in  
771 RNA-seq.

\*\*\*\**p* < 0.0001 (Student's t test; D). Data were pooled from two independent experiments

(B, C and E).

770

771

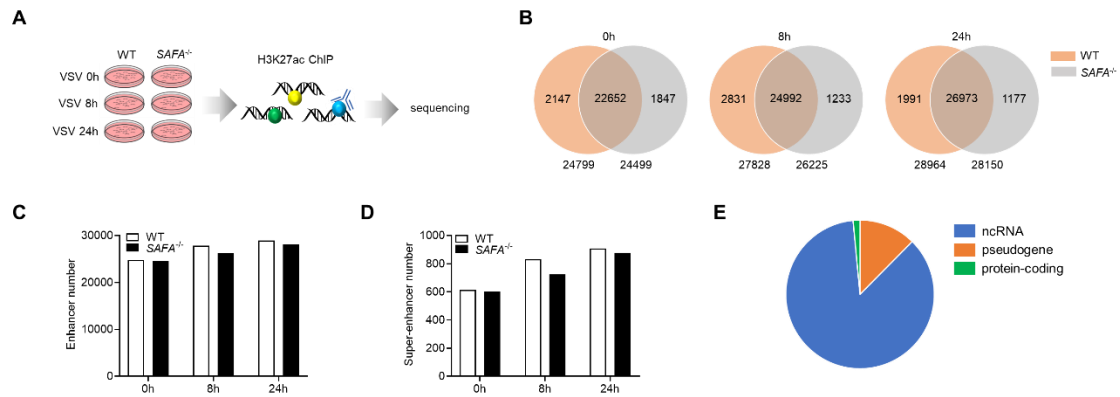

Supplementary Figure 2

772

773 **Figure S2. SAFA deficiency decreased the activation of antiviral immune genes**

774 (A) Models depicting the ChIP-seq assay of H3K27ac in Wild-type (WT) and SAFA<sup>-/-</sup>  
775 THP-1 cells with VSV infection for 6 hours.

776 (B) Venn diagram showing amounts of enhancers in WT and SAFA<sup>-/-</sup> THP-1 cells with  
777 VSV infection.

778 (C) Histogram diagram showing amounts of enhancers in WT and SAFA<sup>-/-</sup> THP-1 cells  
779 with VSV infection.

780 (D) Histogram diagram showing amounts of super-enhancers in WT and SAFA<sup>-/-</sup> THP-1  
781 cells with VSV infection.

782 (E) Pie graph showing distribution of super-enhancer-driven genes.

783 Data were pooled from two independent experiments (B-E).

784

785

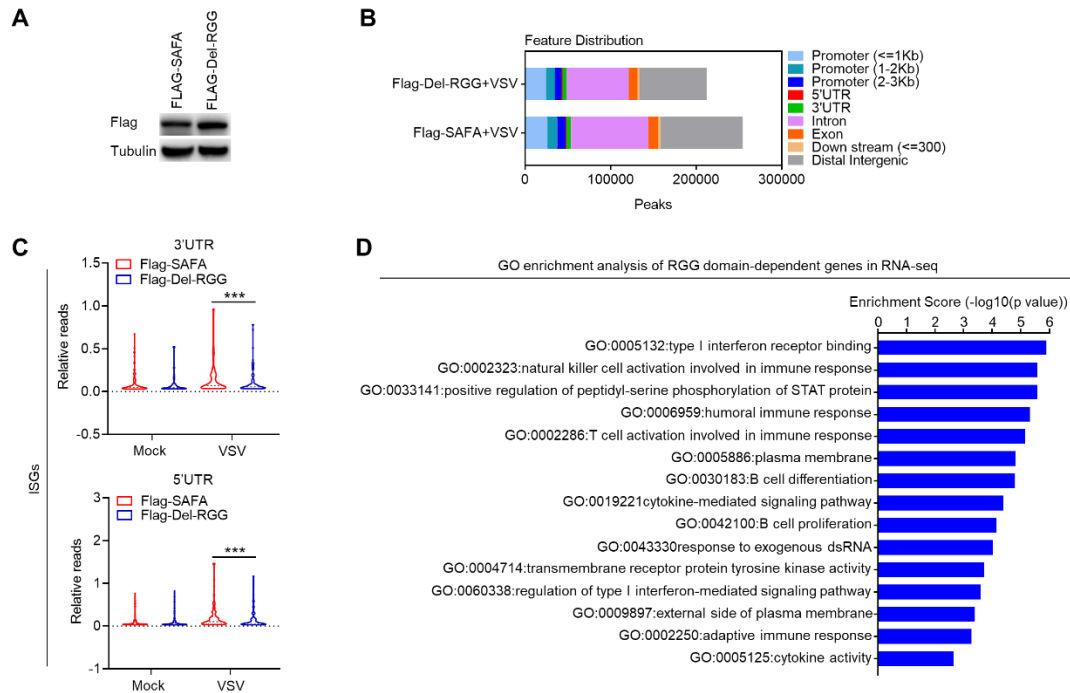

Supplementary Figure 3

786

787 **Figure S3. RNA binding activity of SAFA is critical for increasing the accessibility**  
788 **of anti-viral chromatin**

789 (A) Immunoblotting results showing the expression of Flag-SAFA and Flag-Del-RGG in  
790 SAFA<sup>-/-</sup> THP-1 cells

791 (B) Feature distribution of ATAC-seq profile after VSV infection

792 (C) Violin graph showing ISGs affected by RGG domain depletion in ATAC-seq

793 (D) GO term enrichment analysis of genes significantly affected by RGG domain

794 depletion in RNA-seq

795 \*\*\**p* < 0.001 (Student's *t* test; C). Data were pooled from two independent experiments (B

796 and D). Data were representative of two independent experiments (A).

797

798

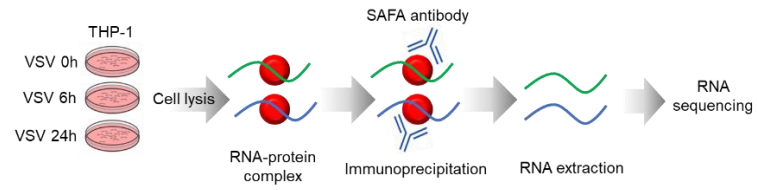

#### Supplementary Figure 4

799

800 **Figure S4. SAFA interacted with antiviral related RNAs in a time-dependent manner**  
801 **during viral infection**

802 Models depicting the RIP-seq assay of SAFA in THP-1 cells with VSV infection for 6 or 24  
803 hours.

804

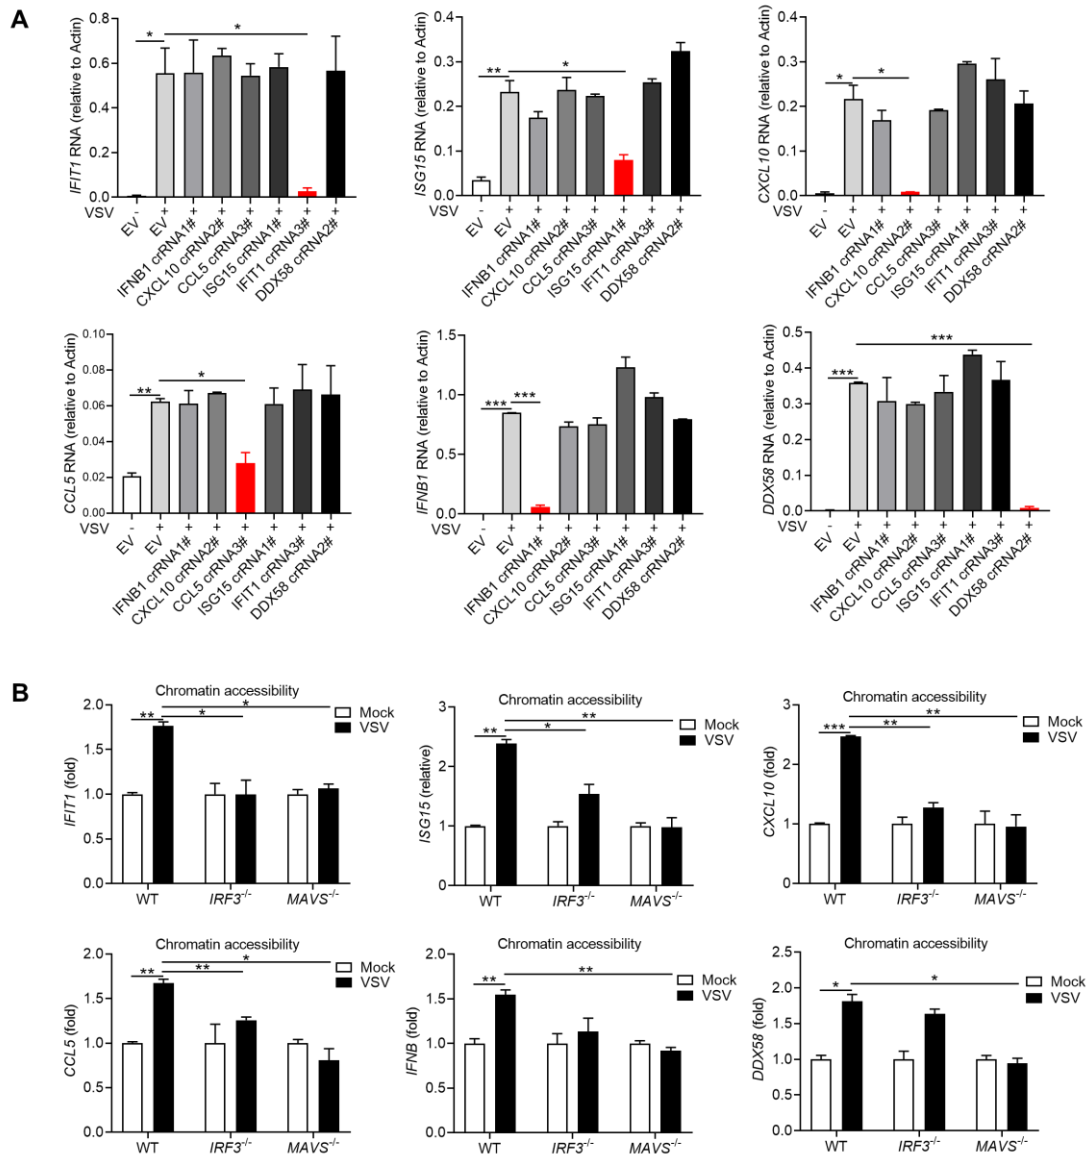

Supplementary Figure 5

805

806 **Figure S5. SAFA-interacting RNA mediated specific chromatin remodeling in an**  
 807 **extranuclear pathway dependent manner**

808 (A) Histogram showing the RNA expression with indicated crRNA transfection for 48  
 809 hours and with or without VSV infection for 18 hours

810 (B) ATAC-qPCR results showing the chromatin accessibility of indicated genes after VSV  
 811 infection for 18 hours in WT, *IRF3*<sup>-/-</sup> and *MAVS*<sup>-/-</sup> THP-1 cells.

812 \**p* < 0.05, \*\**p* < 0.01, \*\*\**p* < 0.001 (Student's t test). Data were pooled from three  
 813 independent experiments. Error bars, SEM. *n* = 3 cultures.

814

815

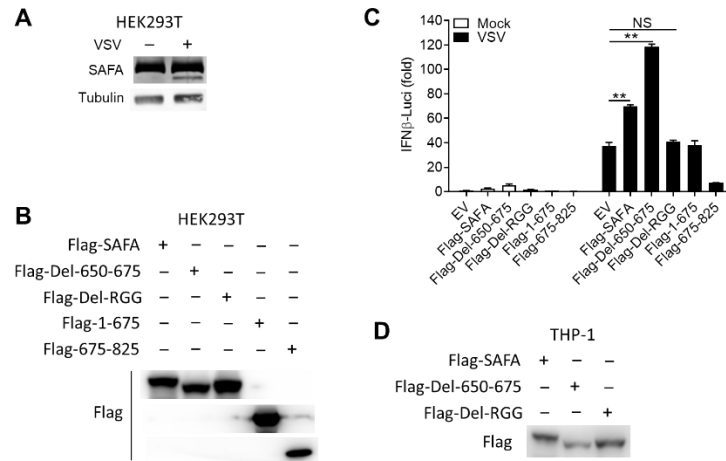

Supplementary Figure 6

816

817 **Figure S6. Virus-mediated cleavage separates the RNA-binding domain from SAFA**

818 (A) HEK293T cells were infected with VSV for 4 hours, and the indicated protein were  
819 detected by immunoblotting.

820 (B) HEK293T cells were transfected with indicated plasmids, and the expression level of  
821 these plasmids were detected by immunoblotting

822 (C) Luciferase activity of IFNβ in HEK293T cells expressing IFNβ–Luc plasmid together  
823 with either an empty vector or indicated plasmids, after 24 hours infected with VSV for 24  
824 hours.

825 (D) THP-1 mutants were generated by overexpressing indicated lentivirus plasmids, and  
826 the expression level of these plasmids were detected by immunoblotting.

827 \*\* $P < 0.01$  (Student's t-test). Data were representative of three independent experiments  
828 (A, B and D). Data were pooled from 3 independent experiments (C). Error bars, SEM.  $n$   
829 = 3 cultures.

830

831 Table S1: CrRNA sequence

| Gene                   | crRNA                    |
|------------------------|--------------------------|
| Human <i>IFB1</i> 1#   | ATAGCAAAGATGTTCTGGAGCAT  |
| Human <i>IFB1</i> 2#   | AGCAAAGATGTTCTGGAGCATCT  |
| Human <i>IFB1</i> 3#   | AACAATAGTCTCATTCCAGCCAG  |
| Human <i>IFB1</i> 4#   | CTGATGATAGACATTAGCCAGGA  |
| Human <i>CXCL10</i> 1# | AGTCAGAAAGATAAGGCAGCAA   |
| Human <i>CXCL10</i> 2# | GAGTCAGAAAGATAAGGCAGCAA  |
| Human <i>CXCL10</i> 3# | AGAGTCAGAAAGATAAGGCAGCA  |
| Human <i>IFIT1</i> 1#  | AGTGACATCTCAATTGCTCCAGA  |
| Human <i>IFIT1</i> 2#  | GTGACATCTCAATTGCTCCAGAC  |
| Human <i>IFIT1</i> 3#  | AAGTGACATCTCAATTGCTCCAG  |
| Human <i>IFIT1</i> 4#  | GTCATCAATGGATAACTCCCATG  |
| Human <i>ISG15</i> 1#  | TTCGTCGCATTTGTCCACCACCA  |
| Human <i>ISG15</i> 2#  | TCGTCGCATTTGTCCACCACCAG  |
| Human <i>ISG15</i> 3#  | CGTCGCATTTGTCCACCACCAGC  |
| Human <i>ISG15</i> 4#  | GTTTCGTCGCATTTGTCCACCACC |
| Human <i>DDX58</i> 1#  | ATCCAAAAAGCCACGGAACCAGC  |
| Human <i>DDX58</i> 2#  | AGAAAAAGTGTGGCAGCCTCCAT  |
| Human <i>DDX58</i> 4#  | CATCCAAAAAGCCACGGAACCAG  |
| Human <i>CCL5</i> 1#   | CAAAGAGTTGATGTACTCCCGAA  |
| Human <i>CCL5</i> 2#   | CCAAAGAGTTGATGTACTCCCGA  |
| Human <i>CCL5</i> 3#   | CAAGCTAGGACAAGAGCAAGCAG  |
| Human <i>CCL5</i> 4#   | AAGAGCAAGCAGAAACAGGCAAA  |

832

833

834 Table S2. Primers for qRT-PCR

| Gene                | Forward Primer (5'-3')     | Reverse Primer (5'-3')   |
|---------------------|----------------------------|--------------------------|
| Human <i>IFB1</i>   | AGGACAGGATGAACTTTGAC       | TGATAGACATTAGCCAGGAG     |
| Human <i>IFIT1</i>  | CATCAGGTCAAGGATAGTCTGGAGC  | GGTTGTCATGTTCTTCCTGCATT  |
| Human <i>ISG15</i>  | ATCGGCGTGCACGCCTTCCAGCA    | TGCTTCAGGTGGGCCACGGTCT   |
| Human <i>DDX58</i>  | AGGGAGGAAGAGGTGCAGTATA     | GATATCGGTTGGGATAATTCTGG  |
| Human <i>CXCL10</i> | CAAACCTGCCATTCTGATTTGCTGCC | GCTTTCAGTAAATTCTTGATGGCC |
| Human <i>CCL5</i>   | CTACACCAGTGGCAAGTGCTCC     | GGTTCAAGGACTCTCCATCCTAG  |
| Human <i>ACT1H</i>  | AAAGACCTGTACGCCAACAC       | GTCATACTCCTGCTTGCTGAT    |

835



836 Table S3. Primers for ATAC-qRT-PCR

| Gene                | Forward Primer (5'-3') | Reverse Primer (5'-3')  |
|---------------------|------------------------|-------------------------|
| Human <i>IFB1</i>   | CTGGAAGTCTGCAGCTGCTT   | GCTCTCCTGTTGTGCTTCTCCAC |
| Human <i>IFIT1</i>  | CTTGCAAGGACACACCCACAGC | TTACAGCAACCATGAGGTAAGG  |
| Human <i>ISG15</i>  | CTGACGTGTGTGCCTCAGGCTT | ATTGGCTGGCACAGAGCCCACCT |
| Human <i>DDX58</i>  | ATCCTGGAAGGCTTGCAGGCTG | AAGTTCCTATGCAGCTCCGCCT  |
| Human <i>CXCL10</i> | TGGTGCTGAGACTGGAGGTTCC | CCTTCGAGTCTGCAACATGGGAC |
| Human <i>CCL5</i>   | AGCAATGAGGATGACAGCGAGG | TACCGGCCAATGCTTGTTGC    |

837
